**Title:** A new gene encoding a cytosolic glutamine synthetase in pine is linked to developing tissues

**Running title:** New conifer glutamine synthetase 1 gene linked to developing tissues

**Authors:** José Miguel Valderrama-Martín<sup>1,2</sup>, Francisco Ortigosa<sup>1</sup>, Juan Carlos Aledo<sup>2</sup>, Concepción Ávila<sup>1</sup>, Francisco M. Cánovas<sup>1</sup>, Rafael A. Cañas<sup>2\*</sup>.

**Addresses:** <sup>1</sup>Grupo de Biología Molecular y Biotecnología de Plantas, Departamento de Biología Molecular y Bioquímica, Universidad de Málaga, Campus Universitario de Teatinos, 29071-Málaga, Spain

<sup>2</sup>Integrative Molecular Biology Lab, Universidad de Málaga, Campus Universitario de Teatinos, 29071-Málaga, Spain

**Correspondence:** \*Rafael A. Cañas, Departamento de Biología Molecular y Bioquímica, Facultad de Ciencias, Universidad de Málaga, Campus Universitario de Teatinos s/n, E-29071 Málaga, Spain. e-mail: [rcanas@uma.es](mailto:rcanas@uma.es) Phone number: +34-925-131673 Fax number: +34-952-132041.

**Authors e-mails:** José Miguel Valderrama-Martín ([jmvalderrama@uma.es](mailto:jmvalderrama@uma.es)); Francisco Ortigosa ([fortigosa@uma.es](mailto:fortigosa@uma.es)); Juan Carlos Aledo ([caledo@uma.es](mailto:caledo@uma.es)); Concepción Ávila ([cavila@uma.es](mailto:cavila@uma.es)); Francisco M. Cánovas ([canovas@uma.es](mailto:canovas@uma.es)); Rafael A. Cañas ([rcanas@uma.es](mailto:rcanas@uma.es)).

**ORCID IDs:** JMVM (0000-0003-1350-899X); FO (0000-0002-7517-7594); JCA (0000-0002-3497-9945); CA (0000-0001-8817-7529); FMC (0000-0002-4914-2558); and RAC (0000-0001-9727-5585)

**Date of submission:** 27 October 2022

**Figures:** 6; **Tables:** 2; **Supplementary Figures:** 13, **Supplementary Tables:** 2; **Supplementary Datasets:** 3

**Total word count:** 5493 (**Abstract:** 172; **Introduction:** 1190; **Results:** 2190; **Discussion:** 1685; **Supplementary Data titles:** 428)

1 **HIGHLIGHT (30 palabras)**

2 A new GS1b paralog (GS1b.2) expressed in developing tissues has been identified in pine.  
3 The kinetic properties of the enzyme differ from those of the previously studied GS1b.1,  
4 despite their high sequence identity.

5 **ABSTRACT**

6 The enzyme glutamine synthetase (EC 6.3.1.2) is mainly responsible for the incorporation  
7 of inorganic nitrogen into organic molecules in plants. In the present work, a new pine *GSI*  
8 (*PpGS1b.2*) gene was identified, showing a high sequence identity with the *GS1b.1* gene  
9 previously characterized in conifers. Phylogenetic analysis revealed that the presence of  
10 *PpGS1b.2* is restricted to the genera *Pinus* and *Picea* and is not found in other conifers.  
11 Gene expression data suggest a putative role of *PpGS1b.2* in plant development, similar to  
12 other *GS1b* genes from angiosperms, suggesting evolutionary convergence. The  
13 characterization of GS1b.1 and GS1b.2 at the structural, physicochemical, and kinetic  
14 levels has shown differences even though they have high sequence homology. Alterations  
15 in the kinetic characteristics produced by the site-directed mutagenesis approach carried out  
16 in this work strongly suggest an implication of amino acids at positions 264 and 267 in the  
17 active center of pine GS1b.1 and GS1b.2. Therefore, the amino acid differences between  
18 GS1b.1 and GS1b.2 would support the functioning of both enzymes to meet distinct plant  
19 needs.

20 **KEYWORDS:** Biochemistry, development, glutamine synthetase, kinetic parameters,  
21 nitrogen metabolism, physicochemical properties, conifer

22 **ABBREVIATIONS**

23 **EC50** = the concentration of substrate that produces a half-maximal enzyme velocity

24 **K<sub>i</sub>** = dissociation constant for substrate binding

25 **K<sub>m</sub>** = Michaelis-Menten constant

26 **n<sub>H</sub>** = Hill slope

27 **V<sub>max</sub>** = maximum enzyme velocity

## 28 INTRODUCTION

29 Nitrogen (N) is an essential element, a constituent of the main biomolecules and a limiting  
30 factor for plant growth (Hirel and Krapp, 2021). N is assimilated from ammonium into  
31 organic molecules by the glutamine synthetase (GS, EC 6.3.1.2)/glutamate synthase  
32 (GOGAT, EC 1.4.7.1) cycle. Ammonium is first incorporated into glutamate to form  
33 glutamine in an ATP-dependent reaction catalyzed by the GS enzyme (Heldt and Piechulla,  
34 2011), and then this glutamine together with 2-oxoglutarate is used to produce two  
35 glutamate molecules by the GOGAT enzyme (Bernard and Habash, 2009). Studies have  
36 shown that up to 95% of ammonium is assimilated via the GS/GOGAT cycle (Lea *et al.*,  
37 1999) for the formation of glutamine and glutamate, which, in turn, will be used to produce  
38 all N-containing biomolecules in the plant (Forde and Lea, 2007; Bernard and Habash,  
39 2009).

40 The GS enzyme has been widely studied in plants since it is directly responsible for the  
41 incorporation of inorganic N into organic molecules. Recently, three different lineages of  
42 GS genes have been identified in seed plants: *GS1a* and *GS1b* encode cytosolic enzymes,  
43 and *GS2* encodes a plastid-located enzyme (Valderrama-Martín *et al.*, 2022). The three GS  
44 gene lineages are present in cycads and *Ginkgo biloba*, as well as basal angiosperms.  
45 Nevertheless, no GS2 genes have been found in other gymnosperms, such as conifers and  
46 gnetales, and no *GS1a* genes have been found in modern angiosperms, including monocot  
47 and eudicotyledon species (Valderrama-Martín *et al.*, 2022). In general, GS1b is encoded  
48 by a small multigene family, while GS1a and GS2 are usually encoded by a single nuclear  
49 gene (James *et al.*, 2018; Valderrama-Martín *et al.*, 2022).

50 GS2 and GS1a are associated with photosynthetic organs (Blackwell *et al.*, 1987; Ávila *et al.*,  
51 2001), and their expression is regulated by light conditions (Cantón *et al.*, 1999;  
52 Gómez-Maldonado *et al.*, 2004a; Valderrama-Martín *et al.*, 2022). Indeed, GS2 and GS1a  
53 are considered to play a fundamental role in the assimilation of the ammonium released  
54 during photorespiration and nitrate photoassimilation processes (Wallsgrave *et al.*, 1987;  
55 Blackwell *et al.*, 1987; Cantón *et al.*, 1999; Tegeder and Masclaux-Daubresse, 2017). In  
56 this sense, new evidence suggests that the *GS2* gene may have arisen through a gene duplication

57 from a *GS1a* gene in a common ancestor of cycads, ginkgo, and angiosperms (Valderrama-  
58 Martín *et al.*, 2022).

59 GS1b corresponds to the GS1 isoenzyme traditionally studied in model angiosperms.  
60 Although this lineage is represented by a unique gene in most of the gymnosperms, in  
61 ginkgo and angiosperms, GS1b is represented by a small multigenic family. These genes  
62 have different expression patterns depending on the organ and physiological conditions  
63 accounting for their different functions (Hirel and Krapp, 2021). These enzymes have been  
64 described as a key components of plant nitrogen use efficiency, with essential roles in  
65 processes such as senescence (Thomsen *et al.*, 2014), amino acid catabolism, primary  
66 assimilation, and different stress responses (Bernard and Habash, 2009). The different  
67 genes of this lineage are differentially regulated by developmental state, tissue, nutritional  
68 status, and external stimuli (Thomsen *et al.* 2014; Hirel and Krapp, 2021). Finally, several  
69 studies have focused on the enzymatic characterization of GS from angiosperms and  
70 gymnosperms (Sakakibara *et al.*, 1996; de la Torre *et al.*, 2002; Ishiyama *et al.*, 2004a;  
71 Ishiyama *et al.*, 2004b; Ishiyama *et al.*, 2006; Yadav, 2009; Zhao *et al.*, 2014; Castro-  
72 Rodríguez *et al.*, 2015) to define a more accurate role landscape for the different GS  
73 isoforms.

74 Some GS1b isoforms are directly related to developmental processes and have been  
75 associated with grain yield in crops. *AtGS1.1* and *AtGS1.2* from *Arabidopsis thaliana* are  
76 involved in seed production and germination (Guan *et al.*, 2015). *AtGS1.1* has also been  
77 described to be involved in root development during seed germination and *AtGS1.2* plays a  
78 role in rosette development (Lothier *et al.*, 2011; Guan *et al.*, 2015). Indeed, a recent study  
79 over of *AtGS1.1*, *AtGS1.2* and *AtGS1.3* *Arabidopsis* mutants suggested synergistic roles for  
80 these genes in plant growth and development (Ji *et al.*, 2019). In cereals, enzymes of this  
81 GS lineage are involved in seed yield and plant development, such as *GS1;3* from *Oryza*  
82 *sativa* and *Hordeum vulgare*, which play roles in seed maturation and germination (Goodall  
83 *et al.*, 2013; Fujita *et al.*, 2022). Thus, overexpressing lines of *HvGS1.1* showed an  
84 improvement in grain yield (Gao *et al.*, 2019). Rice mutants lacking the *OsGS1;1* gene  
85 presented reduced grain filling and growth (Tabuchi *et al.*, 2005), although the same  
86 phenotype was present in rice lines overexpressing *OsGS1;1* (Bao *et al.*, 2014). In addition,  
87 rice lines grown in culture chambers and overexpressing *OsGS1;1* presented an increase in

88 spikelet yield. Rice mutants for *OsGS1b;2* also presented a depletion in the number of  
89 tillers (Funayama *et al.*, 2013), and *Sorghum bicolor* lines overexpressing *GS1* genes  
90 exhibited the opposite phenotype (Urriola and Rathore, 2015). Studies in *Zea mays* using  
91 mutant lines for *ZmGS1b.3* and *ZmGS1b.4* have shown the roles of these genes in kernel  
92 number and size, respectively (Martin *et al.*, 2006). Transgenic lines of *Phaseolus vulgaris*  
93 overexpressing *GS1* also showed earlier flower and seed development, while  
94 overexpressing *GS1* lines of wheat showed an increase in grain weight (Habash *et al.*,  
95 2001). Moreover, a recent study on wheat indicated that *TaGS1.1* and *TaGS1.3* are mainly  
96 expressed in embryos and grain transport tissues, where these isoforms synergistically carry  
97 out ammonium assimilation (Wei *et al.*, 2021).

98 In conifers, only one isoform of the *GS1b* family has been identified to date. The unique  
99 *GS1b* identified in conifers has been suggested to play an essential role in N remobilization  
100 to developing organs (Suárez *et al.*, 2002). Previous works in pine have shown that *GS1b* is  
101 involved in the canalization of ammonium into glutamine during seed germination and the  
102 early developmental stages of seedlings (Ávila *et al.*, 2001), which could be important for  
103 the loss of seed dormancy (Schneider and Gifford, 1994). Indeed, the roles of *GS1b* in seed  
104 development and germination are also supported by its expression patterns associated with  
105 the vascular system of zygotic and somatic pine embryos at different developmental stages  
106 and by its expression in procambium cells of pine zygotic embryos (Pérez-Rodríguez *et al.*,  
107 2005). Moreover, the expression of this isoenzyme has been suggested to be controlled by  
108 gibberellic acid, a phytohormone involved in many aspects of plant growth and  
109 development (Gómez-Maldonado *et al.*, 2004b).

110 In this work, a new gene encoding a cytosolic *GS* (*PpGS1b.2*) was identified in maritime  
111 pine (*Pinus pinaster*). This gene was discovered through sequence searches in  
112 transcriptomic data from isolated tissues through laser capture microdissection (Cañas *et al.*  
113 *et al.*, 2017). Orthologs of this gene have also been identified in the genomes of other  
114 conifers, and phylogenetic analysis has revealed that *PpGS1b.2* belongs to the *GS1b*  
115 lineage. Although this new *GS1* gene presents a high sequence homology to the already  
116 known *PpGS1b*, hereafter *PpGS1b.1*, *PpGS1b.2* showed low expression levels with  
117 characteristic and localized tissue expression. The expression patterns suggest that this new  
118 gene could play a specific role during plant development, mainly during embryo

119 development, as has been shown for other *GS1b* genes in angiosperms. Furthermore, a  
120 detailed comparative analysis of the kinetic properties of the isoenzymes GS1b.1 and  
121 GS1b.2 and single/double-point mutants of both isoforms support distinct functions for  
122 these enzymes in pine.

## 123 MATERIAL AND METHODS

### 124 Sequence identification and phylogenetic analyses

125 The phylogenetic analysis was made using protein sequences of plant GS that were  
126 obtained from online public databases or assembled from transcriptomic data contained in  
127 the SRA database at the NCBI except for *Pinus pinaster* sequences that were cloned and  
128 sequenced in the present work (Table S1). For the sequence obtaining, the procedure  
129 presented in Valderrama-Martin *et al.* (2022) was followed. Briefly, *tblastn* was used in  
130 BLAST searches (Altschul *et al.*, 1990) using GS1b.1 from *Pinus taeda* as the query.  
131 Transcriptomic assemblies were made in the web platform Galaxy (Afgan *et al.*, 2018).  
132 Raw reads were trimmed using *trimmomatic* (Bolger *et al.*, 2014) and assembled with  
133 *Trinity* (Grabherr *et al.*, 2011). Database identifiers, names and species for the different  
134 GS sequences are presented in Table S1. All protein sequences used in the present work  
135 are available in Dataset S1.

136 The sequence data set was composed of 96 GS proteins. The phylogenetic analysis was  
137 mainly focused on conifer GS sequences. The alignment and phylogenetic analysis were  
138 conducted as described in Valderrama-Martin *et al.* (2022) using MEGA version 11  
139 (Tamura *et al.*, 2021). The alignment was conducted with *muscle* (Edgar, 2004). The  
140 phylogenetic analysis was carried out through a maximum-likelihood estimation with  
141 complete deletion of gaps, the missing data, and the Jones–Taylor–Thornton amino acid  
142 substitution model (Jones *et al.*, 1992). Nearest-neighbor interchange was used for tree  
143 inference. The initial tree was constructed using the NJ/BioNJ method. The phylogeny test  
144 was performed using the bootstrap method with 1000 replications. The GS sequences of  
145 *Chlamydomonas reinhardtii* were used as outer group. The distance matrix and the original  
146 tree in Newick format are available in Datasets S2 and S3. The original tree was visualized  
147 with the Interactive Tree of Life web tool (Letunic and Bork, 2019).

148

### 149 Protein structure prediction and modeling

150 For the 3D modeling and structure predictions of *P. pinaster* GS1b.1 and GS1b.2 individual  
151 subunits, AlphaFold (Jumper *et al.*, 2021; Varadi *et al.*, 2022) through ColabFold (Mirdita

152 *et al.*, 2022) has been used. ColabFold allows faster protein structure prediction by  
153 integrating MMseqs2 for multiple sequence alignments and AlphaFold2, but it does not  
154 allow the structure prediction of large protein subunits or complexes. The quaternary  
155 structure prediction has been achieved using Alphafold's models as input for the Galaxy  
156 Package, a combination of several programs that have been designed based on sequence  
157 and structure information together with physical chemistry principles (Shin *et al.*, 2014).  
158 The models obtained from ColabFold were employed for the comparison and graphic  
159 representation of the protein structure in PyMOL (Schrödinger and DeLano, 2020) and in  
160 Jmol (<http://www.jmol.org/>). Jmol was also used for the calculation of the hydrogen bonds.  
161 Quaternary structure models obtained with Alphafold and the Galaxy Package has been  
162 used in PyMol for the structure analysis and comparison of the models. The  
163 thermodynamic stability of the monomers has been determined using models obtained in  
164 AlphaFold together with the “foldx.mut()” function of the “ptm” R package (Aledo, 2021).

165

## 166 **Plant material**

167 Maritime pine seeds (*P. pinaster* Aiton) from *Sierra Segura y Alcaraz* (Albacete, Spain)  
168 (ES17, Ident. 09/10) were provided by the *Red de Centros Nacionales de Recursos*  
169 *Genéticos Forestales* of the Spanish *Ministerio para la Transición Ecológica y el Reto*  
170 *Demográfico* with the authorization number ESNC103. Pine seeds were imbibed for 48 h in  
171 water with aeration to induce germination. Seeds were germinated in vermiculite. Seedlings  
172 were grown in plant growth chambers (Aralab Fitoclima 1200, Rio de Mouro, Portugal)  
173 under 16 h light photoperiod, a light intensity of  $125 \mu\text{mol m}^{-2} \text{s}^{-1}$ , a constant  
174 temperature of  $23^\circ\text{C}$ , 50% relative humidity and watered twice a week with distilled  
175 water. Embryo and seedling samples were harvested at different stages: dry, post-  
176 imbibition and germinated (0.5 cm of emerged radicle) embryos; and one-week-old from  
177 emergence (Stage 1) and one-month-old from emergence seedlings (Stage 2). At the  
178 harvest, seedlings were divided into their different organs. For the measure of *GS* gene  
179 expression in different sections of roots, 2 months-old seedlings were used. The samples  
180 were immediately frozen in liquid N and stored at  $-80^\circ\text{C}$  until powdering with a mixer mill  
181 MM400 (Retsh, Haan, Germany) and further analyses were conducted.



182 Plant material and cDNA to analyze *GS* gene expression levels in maritime pine tissues  
183 from one-month-old seedlings were previously obtained by Cañas *et al.* (2017). RNA  
184 samples from 14 tissues isolated through laser capture microdissection were employed. The  
185 cDNA was synthesized and amplified as described by Cañas *et al.* (2014).

186 Samples from Cañas *et al.* (2015) were used to analyze *GS* gene expression in needles of  
187 adult trees. Briefly, needle whorls corresponding to the annual growth of a single year were  
188 harvested from different 25 years old *P. pinaster* specimens at *Los Reales de Sierra*  
189 *Bermeja* (Estepona, Spain). Whorls were named from 0 to 3 referring to the year of  
190 appearance of that whorl. Whorl 0 was first collected in May when it was completely  
191 formed. Samples were collected each month throughout 2012, were immediately frozen in  
192 liquid nitrogen and stored at  $-80^{\circ}\text{C}$  until their utilization for RNA extraction. Buds and  
193 nascent needles were collected from the same adult specimens once a week during April of  
194 2013. For gene expression analyses three different trees were employed.

195 Juvenile and mature phloem, together with male and female strobili were harvested from 25  
196 to 35-year-old maritime pines located at *Los Reales de Sierra Bermeja* (Estepona, Spain)  
197 Juvenile xylems were collected from the last 5 internodes in the crown and mature xylem  
198 from the base of the trunk of 28 to 31-year-old maritime pines from *Los Reales de Sierra*  
199 *Bermeja* by removing bark and phloem and scraping with a sterile blade. (Villalobos,  
200 2008). All the tissues were frozen immediately using liquid nitrogen and storage at  $-80^{\circ}\text{C}$   
201 until use

202 Zygotic embryos from *P. pinaster* were obtained from a single maritime pine seed orchard  
203 (PP-VG-014, Picard, Saint-Laurent-Médoc, France) and collected at different  
204 developmental stages (Avila *et al.*, 2022). All samples were frozen in liquid nitrogen and  
205 stored at  $-80^{\circ}\text{C}$  until use.

206

## 207 **RNA extraction and RT-qPCR**

208 Total RNA from maritime pine samples was extracted following Canales *et al.* (2012).  
209 RNA concentration and purity (A260/A280) was then quantified using a NanoDrop© ND-  
210 1000 spectrophotometer (ThermoFisher Scientific, Waltham, MA, USA). The integrity of  
211 the RNA was checked by electrophoresis. iScript Reverse Transcription Supermix (Bio-

212 Rad, Hercules, CA, USA) was used for the reverse transcription of 500 ng of total RNA of  
213 each sample in a final volume reaction of 10 $\mu$ L including 2 $\mu$ L of reaction buffer and 0,5 $\mu$ L  
214 of reverse transcriptase enzyme with the following conditions in a thermal cycler with the  
215 following conditions: 30 min at 42°C; 10 min at 65°C; hold at 4°C.

216 For the RT-qPCR analysis, three biological samples were used with three technical  
217 replicates each. The qPCR was carried out using 5  $\mu$ L SsoFast<sup>TM</sup> EvaGreen<sup>®</sup> Supermix  
218 (Bio-Rad, Hercules, CA, USA), 10 ng of cDNA, 20 pmol of each primer in a total reaction  
219 volume of 10  $\mu$ L on a C1000<sup>TM</sup> Thermal Cycler with a CFX384<sup>TM</sup> Touch Realm-Time PCR  
220 Detection System (Bio-Rad, Hercules, CA, USA) with the following conditions: initial  
221 denaturation step at 95°C 2 min; 40 cycles of denaturation at 95 °C 5 s and elongation at 60  
222 °C 20 s. Finally, a melt curve was developed from 65 to 95 °C with increments of 0.5 °C  
223 each 5 s. Two maritime pine *saposin-like aspartyl protease* and *RNA binding protein* genes  
224 were used as reference for results normalization (Granados et al., 2016). Expression data  
225 have been analyzed using the *qpcR* R library and the MAK3 model (Ritz and  
226 Spiess, 2008). The primers used for RT-qPCR assays are presented in Table S2.

227

## 228 **Cloning, mutagenesis, recombinant expression, and purification of GS1b.1 and** 229 **GS1b.2**

230 In the search for new *GS* genes in conifers, 3 genes in *P. pinaster* have been identified in  
231 transcriptome databases that were named as *PpGS1a*, *PpGS1b.1* and *PpGS1b.2*. The cDNA  
232 of the three genes were amplified by PCR using iProof HF Master Mix (Bio-Rad, Hercules,  
233 CA, USA) and cloned into the pJET1.2 vector (ThermoFisher Scientific, Waltham, MA,  
234 USA) following the manufacturers' instructions. The used primers were designed from  
235 sequences obtained from the maritime pine transcriptome assembled in Cañas *et al.* (2017).  
236 Primers are shown in Table S2. *PpGS1a* was obtained from amplified cDNA of emerging  
237 needles (EN) isolated in Cañas *et al.* (2017). *PpGS1b.1* and *PpGS1b.2* were obtained from  
238 amplified cDNA of developing root cortex (DRC) isolated in Cañas *et al.* (2017).

239 For protein recombinant expression, the CDS of wild type (WT) *PpGS1b.1* and *PpGS1b.2*  
240 were subcloned into pET30a vector (Merck, Darmstadt, Germany) including a N-terminal  
241 6xHis-tag by PCR. For this task, AseI and XhoI sites were added to *PpGS1b.1* 5' and

242 3'ends respectively while NdeI and XhoI sites were added to *PpGS1b.2* 5' and 3' endings  
243 respectively. These restriction sites along with the 6xHis-tag were introduced by PCR.  
244 Used primers are listed in Table S2. The plasmid and PCR product were then cut using the  
245 appropriate restriction enzymes and the PCR product was inserted into the plasmid using  
246 T4 DNA ligase.

247

248 Plasmids were transformed and expressed in the *Escherichia coli* strain BL-21 (DE3) RIL  
249 cells (Agilent, Santa Clara, CA, USA). For protein expressions, the bacterial clones were  
250 grown at 37 °C and 180 rpm in an orbital shaker with 500 mL of Luria-Bertani medium  
251 supplemented with kanamycin (0.05 mg/mL) and chloramphenicol (0.034 mg/mL). When  
252 the optical density (OD) reached a 0.5-0.6 value at 600 nm, cultures were tempered and  
253 isopropyl- $\beta$ -D-thiogalactoside was added to a final concentration of 1 mM to induce protein  
254 expression. Once the isopropyl- $\beta$ -D-thiogalactoside was supplied the cultures were  
255 incubated at 25 °C and 120 rpm for 5 hours, the cells were collected by centrifugation. The  
256 bacterial pellet was resuspended in 5 mL of buffer A (Tris 50 mM pH 8; NaCl 300 mM;  
257 imidazole 250 mM) with 4 mg of lysozyme and incubated for 30 min in ice, bacteria were  
258 then lysed by ultrasonication with 20 pulses of 5 seconds at 20% amplitude with 5 seconds  
259 rest between pulses in a Branson Sonifier® Digital SFX 550 (Branson Ultrasonics, CT,  
260 USA). The soluble fraction was clarified by centrifugation (1620 x g at 4 °C for 30 min).  
261 Proteins from the soluble fraction were purified by affinity chromatography with Protino  
262 Ni-TED PackedColumns2000 (Macherey-Nagel, Düren, Germany) based on the His-tag  
263 tail. The soluble fraction from bacterial lysate was loaded in a column previously  
264 equilibrated with buffer A. Protein elution was performed by adding buffer B (Tris 50 mM  
265 pH8; NaCl 300 mM; imidazole 250 mM) and a total of 9 mL of eluate was recovered in 1  
266 mL fractions. Collected fractions were quantified by Bradford (Bradford, 1976) and  
267 analyzed on SDS-page and western-blot using GS-specific antibodies obtained from rabbit  
268 (Fig. S1) (Cantón *et al.*, 1996). Fractions containing the proteins were concentrated with  
269 Amicon® Ultra-15 Centrifugal Filters Ultracel®-100K (Merck-Millipore, Burlington,  
270 Massachusetts, State of Virginia) with 100 kDa pores and the resulting concentrate was  
271 stored in 50% (v/v) glycerol at -20 °C for later kinetic measurements and physicochemical  
272 analyses.

273

274

275

## 276 **Site-directed mutagenesis**

277 Considering characteristics and properties of differing amino acids between GS1b.1 and  
278 GS1b.2, residues at position 264 and 267 were selected to be shifted between both  
279 isoenzymes. Site-directed mutagenesis was carried out following Edelheit *et al.* (2009). The  
280 wild type CDS from those sequences included on the pET30a vector were amplified by  
281 PCR using two reverse-complementary primers (Table S2) that already included the  
282 mutation to be introduced. The primers were used separately in a PCR reaction using 50 or  
283 500ng of plasmid and 10 pmol of each primer. The final products of both reactions were  
284 then mixed and hybridized. The PCR products were checked out in an agarose gel and  
285 purified using NucleoSpin® Gel and PCR Clean-up (Macherey-Nagel, Düren, Germany).  
286 Finally, the PCR product was digested with FastDigest® DpnI (ThermoFisher Scientific,  
287 Waltham, MA, USA) to degrade the vector used as template for the amplification.

288

## 289 **Physicochemical assays**

290 Physicochemical properties were determined by conducting the transferase assay as  
291 described in Cánovas *et al.* (1991). Reactions were carried out in 96 well microtiter plates  
292 with a final reaction volume of 150  $\mu$ L. The reaction mix contained 90.6 mM MOPS pH 7,  
293 20 mM arsenate, 2.93 mM MnCl<sub>2</sub>, 60 mM NH<sub>2</sub>OH and 0.4 mM ADP. When determining  
294 the optimal pH level for the activity of the different isoforms, different buffers were used  
295 instead when determining the optimal pH level for the activity of the different isoforms:  
296 acetate (4.5-5); MES (6-6.5); HEPES (7-7.5); Tris (8-8.5); and sodium carbonate (9-10).  
297 The reaction was initiated by adding glutamine in a final concentration of 120 mM and,  
298 after 15 minutes of incubation at 37 °C, 150  $\mu$ L of STOP solution (10% FeCl<sub>3</sub> • 6 H<sub>2</sub>O in  
299 HCl 0.2 N; 24% trichloroacetic acid and 5% HCl) was added to stop the reaction. Finally,  
300 the plate was centrifugated for 3 minutes at 3220 x g and 100  $\mu$ L of the reaction volume  
301 were withdrawn for its absorbance measurement at 540 nm in a PowerWave HY (BioTek,

302 Winooski, VT; USA) plate lector. For thermostability characterization, proteins were  
303 preincubated at different times and temperatures before adding the reaction mix.

304

### 305 **Kinetic assays**

306 For the quantification of the kinetic properties, biosynthetic assays were carried out as  
307 described by Gawronski and Benson (2004) with some modifications. Reactions were  
308 conducted in 96 wells microtiter plates in a final volume of 100  $\mu$ L. GS activity was  
309 determined as a function of NADH absorbance depletion at 340 nm in a coupled reaction  
310 using lactate-dehydrogenase (LDH, EC 1.1.1.27) and pyruvate kinase (PyrK, EC 2.7.1.40).  
311 The following reaction mix was used: 50 mM Hepes pH 7, 10 mM  $MgCl_2$ , 60 mM  $NH_4Cl$ ,  
312 250 mM glutamate, 6.25 mM ATP, 1 mM phosphoenolpyruvate, 0.6 mM NADH, 1U  
313 PyRK and 1U LDH. Reactions were pre-incubated for 5 minutes at 37 °C and the GS  
314 activity was initiated by adding different concentrations of the substrate that was being  
315 analyzed. Reactions were developed for 40 min at 37 °C with shaking and absorbance  
316 measurement at 340 nm each minute. Analysis of the kinetic characteristics of GS1b.1 WT,  
317 GS1b.2 WT and their mutants were performed with GraphPad Prism 8.0.0 (GraphPad,  
318 San Diego, CA, USA).

## 319 **RESULTS**

### 320 **Sequence and phylogenetic analyses**

321 A new cytosolic *GS* gene was identified in a transcriptomic analysis of tissues isolated  
322 using laser capture microdissection (Cañas *et al.*, 2017). At the amino acid sequence level,  
323 the new *GS* presents 80.85% and 92.68% identity with *PpGS1a* and *PpGS1b*, respectively  
324 (Fig. 1A). Despite the high identity between the coding sequences of the new gene and  
325 *PpGS1b*, the promoter regions of both genes are very distinct (Fig. S2A). The lengths of the  
326 three pine *GS* proteins are very similar, with 357 residues for *PpGS1a*, 355 for *PpGS1b* and  
327 357 for the new protein (Fig. 1A). However, the calculated isoelectric points were more  
328 different between the pine *GS* proteins, being 6.21 in the case of *PpGS1a*, 5.73 for *PpGS1b*  
329 and 5.36 for the new protein.

330 A phylogenetic analysis confirmed the classification of the *GS* from seed plants into three  
331 main groups, *GS2*, *GS1a* and *GS1b*, in line with previously reported results (Valderrama-  
332 Martín *et al.*, 2022) (Fig. 1B). As expected, no *GS2* sequence was detected in conifers, but  
333 only those of *GS1a* and *GS1b* (Fig. 1B). The new *GS* isoform was grouped within the  
334 conifer *GS1b* sequences; thus, the gene coding this new *GS1b* isoenzyme has been named  
335 *PpGS1b.2*. Orthologs of *PpGS1b.2* have also been detected in other members of the  
336 *Pinaceae* family of the genera *Pinus* and *Picea* but not in the rest of the conifers included in  
337 this analysis (Fig. 1B).

338

### 339 **Gene expression analyses**

340 The expression of *GS* genes in *P. pinaster* has been analyzed in different tissues and  
341 conditions to establish a framework that allows us to unravel the potential role of *PpGS1b.2*  
342 by comparing its expression pattern to other *GS* genes in maritime pine.

343 The expression profiles were analyzed in embryos and seedlings during the initial  
344 developmental stages (Fig. 2A). *PpGS1a* expression was high in cotyledons and needles,  
345 lower in hypocotyls and nearly undetectable in roots and embryos except for germinated  
346 embryos. *PpGS1b.1* and *PpGS1b.2* expression patterns in embryos were very similar, with  
347 a peak of expression in germinated embryos. In seedlings, the expression was ubiquitous in

348 all organs for both genes, although *PpGS1b.2* expression levels were lower than those of  
349 *PpGS1b.1*, between 5- and 10-fold. This expression pattern was different when isolated  
350 tissues were considered (Fig. 2B). *PpGS1b.1* was expressed at high levels throughout the  
351 plant, especially in the root cortex, where the expression was 40 times that shown by this  
352 gene in the other samples. However, *PpGS1b.2* expression was very localized, mainly in  
353 the shoot apical meristem, emerging needles, developing root vascularization and root  
354 meristem. Expression was almost undetectable in the rest of the tissues analyzed. Finally,  
355 the expression of *PpGS1a* was detected only in the three photosynthetic tissues: the  
356 mesophyll of young needles, the mesophyll of cotyledons and the hypocotyl cortex.

357 The seasonal expression of the three *GS* genes has also been quantified in needles from  
358 adult trees (Fig. 3A). *PpGS1a* showed the highest expression, followed by *PpGS1b.1*,  
359 which was expressed between 10 and 30 times less than *PpGS1a*. The expression levels of  
360 *PpGS1b.2* were very low compared to those of other *GS*s. The expression patterns of the  
361 three genes in different whorls were as before, with higher levels in the first months of the  
362 year and lower levels at the end of the year. There was a remarkable exception for whorl 0  
363 in May, the first harvesting month for the needles that emerged during the sampling year.  
364 *PpGS1b.2* exhibited an expression peak in whorl 0 in May. In contrast, *PpGS1a* had its  
365 lowest expression, and *PpGS1b.1* was expressed at similar levels to the other whorls. The  
366 relative abundance of *PpGS1b.2* transcripts was still one and two orders of magnitude  
367 lower than those of *PpGS1b.1* and *PpGS1a*, respectively. According to these results, the  
368 expression levels of the three genes were also analyzed in buds and emerging needles (Fig.  
369 3B-D). The expression of *PpGS1a* was almost undetectable in buds, but its expression  
370 rapidly increased in nascent needles by the end of the month. *PpGS1b.1* expression  
371 remained almost invariable in both organs with a similar expression pattern. The levels of  
372 *PpGS1b.2* were higher in the buds and decreased from Day 14 to 28 when the expression  
373 was similar in buds and emerging needles. The relative abundance of *PpGS1b.1* transcripts  
374 was still higher than that of *PpGS1b.2*.

375 *GS* gene expression has also been analyzed at different developmental stages, including  
376 juvenile and mature xylem and phloem, as well as the male and female reproductive  
377 structures, different root zones and different stages of zygotic embryo development (Fig. 4).  
378 In all those samples, *PpGS1a* expression was barely detectable. An example of *PpGS1a*

379 expression is shown for phloem, xylem, and male and female strobili, with very low levels  
380 ( $< 0.04$ ), even in female strobilus with an expression peak ( $< 0.08$ ) (Fig. 4A). *PpGS1b.1*  
381 expression was the highest observed thus far among the *GS* genes analyzed in vascular  
382 tissues and strobili (Fig. 4A). Interestingly, *PpGS1b.2* expression was almost undetectable  
383 in vascular tissues, but its levels peaked in the male strobilus (approximately 0.28),  
384 opposite to what occurred with *PpGS1b.1* in that organ. In root samples, *PpGS1b.1* and  
385 *PpGS1b.2* presented a similar expression pattern, with increased expression in lateral roots  
386 and root tips, although the expression levels for *PpGS1b.1* were approximately 80-fold  
387 higher than that shown by *PpGS1b.2* (Fig. 4B). Finally, in zygotic embryos, the expression  
388 levels of both genes were significantly higher in the precotyledonary and early  
389 cotyledonary stages, where *PpGS1b.2* levels were higher than those shown by *PpGS1b.1*  
390 (Fig. 4C). However, this ratio of the expression of both genes was reversed in the later  
391 stages of development in cotyledonary and mature embryos. Nevertheless, the differences  
392 in expression between the two genes were not statistically significant in either case.

393

#### 394 **Protein structure prediction and physicochemical and kinetic properties**

395 Very few differences were observed between the GS1b.1 and GS1b.2 subunit structures due  
396 to the similarity of their amino acid sequences (Fig.5A,B). Both proteins presented a  
397 predicted decameric structure formed by two pentameric rings with small differences in  
398 structure and the disposition of the subunits in the quaternary structure (Fig. S3A,B).  
399 However, the thermodynamic stability of GS1b.1 monomers was three times higher than  
400 that of GS1b.2 monomers (Table 1). The *in silico* replacement of residues of the GS1b.1  
401 and GS1b.2 amino acid sequences displayed some differences in the structural stability of  
402 both enzymes (Fig. S4). Some of the amino acids used for this analysis did not cause any  
403 notable effects on the structure or destabilized both proteins equally. However, several  
404 amino acids gave rise to large differences in the free energy of folding. Specifically, the  
405 inclusion of arginine or glutamate around position 280 produced a great destabilization of  
406 the structure of GS1b.2 but not of GS1b.1. Some of these amino acids also caused great  
407 destabilization of GS1b.2 when substituted at position 148 but did not have the same effect  
408 in GS1b.1. In fact, only isoleucine and arginine produced marked effects on the structural



409 stability of GS1b.1. As small differences in the structure suggested that there might be  
410 changes in the physicochemical and kinetic properties of both enzymes, a functional  
411 comparison of the recombinant isoforms of GS1b.1 and GS1b.2 was performed (Fig. 5, S4;  
412 Tables 1, 2).

413 Both isoforms were tested over a wide pH range; GS1b.1 maximum activity was reached at  
414 pH 6.5 while that of GS1b.2 maximum activity was reached at pH 6 (Fig. 5C). The activity  
415 of both enzymes increased with the reaction temperature, reaching the maximum activity at  
416 42 °C (Fig. 5D). These data have allowed the calculation of the activation energy ( $E_a$ ) for  
417 each enzyme (Table 1). The  $E_a$  was different for both enzymes: the  $E_a$  of GS1b.1 was 39.9  
418 kJ/mol, and the  $E_a$  values of GS1b.2 for its elemental reaction steps were 46.1 kJ/mol and  
419 18.7 kJ/mol, with a break point at 24 °C. Regarding the thermal stability, GS1b.1 was very  
420 stable, only decreasing its activity at 60 °C after 5 minutes of preincubation, although it  
421 never completely lost its activity, even after 20 min at 60 °C (Fig. 5E). However, GS1b.2  
422 showed a decreased activity even after 5 minutes of preincubation at 45 °C with almost a  
423 total loss of activity after 5 minutes at 60 °C (Fig. 5E).

424 GS1b.1 and GS1b.2 showed distinctive behaviors for ammonium and glutamate (Fig.  
425 5F,G). GS1b.2 exhibited substrate inhibition for ammonium ( $K_i$  22.57 mM). The affinities  
426 of both enzymes for ammonium were high (GS1b.1  $K_m$  0.12 mM and GS1b.2  $K_m$  0.21  
427 mM). However, the  $V_{max}$  was 5.88 times higher for GS1b.1 (Table 2). Regarding to  
428 glutamate, GS1b.1 showed substrate inhibition at high concentrations ( $K_i$  84.51 mM), while  
429 GS1b.2 presented positive cooperativity. In both cases, the affinity was very low (GS1b.1  
430  $K_m$  64.15 mM and GS1b.2 EC50 48.63 mM), with large differences in the  $V_{max}$  values of  
431 both enzymes (GS1b.1 101.6 nkat/mg protein and GS1b.2 7.66 nkat/mg protein) (Table 2).  
432 GS1b.1 and GS1b.2 showed equal behavior for  $Mg_2^+$ , with positive cooperativity and  
433 similar affinity (EC50 values of 14.49 and 10.87 mM, respectively) but different  $V_{max}$   
434 values (71.32 and 5.64 nkat/mg protein, respectively) (Fig. S5, Table 2). Finally, the  
435 affinities for ATP were high and similar for both enzymes ( $K_m$  of 0.18 and 0.29 mM for  
436 GS1b.1 and GS1b.2, respectively), with a higher  $V_{max}$  for GS1b.1 (24.96 nkat/mg protein)  
437 than for GS1b.2 (7.39 nkat/mg protein). However, there was substrate inhibition for GS1b.1  
438 at moderate levels of ATP ( $K_i$  5.88 mM).

439

440

441

## 442 **Analysis of mutant proteins**

443 To determine the roles that certain residues could play in GS activity, mutants of GS1b.1  
444 and GS1b.2 were obtained by exchanging amino acids at positions 264 and 267. These  
445 residues belong to a region that accumulates a significant number of differences between  
446 the two isoforms and is important for stability, as shown by the *in silico* substitution  
447 analysis (Fig. S4). Additionally, these residues have been selected based on their charge  
448 and structural differences between both GSs. The amino acid swapping at positions 264 and  
449 267 seemed to produce only slight changes in the subunit arrangement, even in the double  
450 mutant. Calculation of hydrogen bonds revealed interactions between residues 264 and 267  
451 with those present at positions 261, 263, 265 and 268. These residues were analyzed in  
452 detail, and only small differences in their arrangements could be observed (Fig. 6A-G, S5).  
453 The quaternary structures of the mutants also showed no significant differences when  
454 compared (Fig. S7) and the thermodynamic stability of the monomers was similar to that of  
455 the WT (Table 1).

456 Compared to WT, none of the optimal pH values were affected in any of the mutants tested,  
457 except for GS1b.2E264K, where the optimum was reached at pH 7 (Fig. S8A), and the  
458 double mutants, where the optimum pH was 6 for both enzymes (Fig. 6H, S9).

459 A slight increase in the optimal temperature (45 °C) was detected in all mutants except for  
460 GS1b.2E264K, which experienced a large change in its optimal temperature (30 °C) (Fig.  
461 6I, S7B). Although the activity patterns in response to reaction temperature were similar in  
462 the mutants with respect to the WT enzymes, the activity was slightly higher at all  
463 temperatures in the GS1b.1K267H single and GS1b.2 double mutants. In the case of  
464 GS1b.1 K264E and GS1b.2 H267K, the activity was higher at temperatures above the  
465 optimum (45 °C). Finally, the GS1b.1 double mutant retains considerable activity levels  
466 (>40%) even at very low reaction temperatures, such as 4 °C (Fig. 6I, S7B).  $E_a$  was barely  
467 affected (Table 1) in GS1b.1K264E (34.8 kJ/mol). In contrast, the GS1b.1 double mutant  
468  $E_a$  was strongly affected (15.2 kJ/mol), and GS1b.1 K267H showed different  $E_a$  values for

469 its elemental reaction steps (35.2 kJ/mol and 6.7 kJ/mol), similar to GS1b.2 WT. However,  
470 GS1b.2 E264K presented a unique  $E_a$  for its reaction (39.9 kJ/mol), and different  $E_a$  values  
471 were detected for the elemental reaction steps of GS1b.2 H267K (33.7 kJ/mol and 10.3  
472 kJ/mol) and the GS1b.2 double mutant (28.4 kJ/mol and 6.7 kJ/mol). Interestingly, all  
473 GS1b.1 mutants experienced decreases in their thermostability compared to that of the WT,  
474 and only GS1b.2H267K showed an increased thermostability compared to GS1b.2 WT  
475 (Fig. 6J, S7C).

476 GS1b.1 behavior regarding ammonium was only modified in the GS1b.1K267H mutant,  
477 which showed substrate inhibition for ammonium ( $K_i$  13.14 mM). Furthermore, the affinity  
478 was increased in this mutant, GS1b.2H267K, and both double mutants ( $K_m$  between 0.02  
479 and 0.09 mM). Meanwhile, all the GS1b.2 mutants lost substrate inhibition by ammonium,  
480 and all exhibited normal hyperbolic saturation (Fig. 6K, S8, Table 2). Regarding glutamate,  
481 GS1b.1K264E lost substrate inhibition, now presenting normal hyperbolic saturation with  
482 an increase in its affinity ( $K_m$  2.2 mM) accompanied by a reduction in  $V_{max}$  (16.82 nkat/mg  
483 protein). Additionally, none of the mutants in 267 and double mutants reached saturation  
484 and seemed to have lost affinity for this substrate, as occurred with  $Mg_2^+$  in all the mutants  
485 except for GS1b.2E264K (Fig. S10, S11, Table 2). GS1b.1 mutants exhibited substrate  
486 inhibition by ATP, but only the double mutants of GS1b.1 lost substrate inhibition by ATP  
487 and presented a normal hyperbolic saturation for this substrate (Fig. S12, Table 2).  
488 Interestingly, all GS1b.2 mutants presented inhibition by ATP ( $K_i$  ranging from 5.06 to  
489 8.76 mM), in contrast to the hyperbolic Michaelis-Menten saturation exhibited by the WT  
490 (Fig. S12, Table 2).

## 491 DISCUSSION

492 The phylogenetic analysis carried out in this work (Fig. 1) grouped the new GS isoform  
493 (GS1b.2) within the conifer GS1b.1 group. Furthermore, the identification of *GS1b.2* in the  
494 genome, its different promoter sequences, including different TF binding sites (Fig. S2B),  
495 and its different gene expression patterns rule out the possibility that it is an allelic variant  
496 of *PpGS1b.1* (HF548531.1), suggesting that *PpGS1b.2* (KU641799.1; KU641800.1) is  
497 likely the result of a gene duplication. The presence of *GS1b.2* in members of the genera  
498 *Pinus* and *Picea* indicates (Fig. 1) that this gene duplication should have taken place in a  
499 common ancestor of these two groups but not of the entire *Pinaceae* family since orthologs  
500 of *GS1b.2* have not been identified in other conifers. Gene duplication is very common in  
501 plants (De Smet and Van de Peer, 2012), and it could lead to the acquisition of new  
502 functions (neofunctionalization) or simply to redundant activity to maintain the correct  
503 metabolic flux, as occurs with GS in *Populus* and rice (Yamaya and Kusano, 2014; Castro-  
504 Rodríguez *et al.*, 2015), contributing to metabolic homeostasis (Moreira *et al.*, 2022). In  
505 fact, the GS1b family in angiosperms has been extended by gene duplication so that  
506 different isoenzymes can play nonredundant or synergistic roles within the plant, as  
507 proposed for *Arabidopsis GS1* genes (Ji *et al.*, 2019).

508 To explore the possible neofunctionalization of this new *GS* after gene duplication, the  
509 expression patterns of the maritime pine *GS* genes were analyzed in different organs and  
510 tissues (Fig. 2-4). *PpGS1b.2* appears to be expressed primarily in developing organs and  
511 tissues and is tightly regulated throughout embryonic development. This contrasts with  
512 *PpGS1b.1* expression, which was high in all analyzed samples. This could indicate a strong  
513 regulation of *PpGS1b.2* at both the localization and expression levels, suggesting a  
514 specialized function. The expression of *PpGS1b.2* is consistent with the association of  
515 some *GS1b* isogenes with plant developmental processes in angiosperms (Habash *et al.*,  
516 2001; Tabuchi *et al.*, 2005; Martin *et al.*, 2006; Lothier *et al.*, 2011; Funayama *et al.*, 2013;  
517 Goodall *et al.*, 2013; Bao *et al.*, 2014; Guan *et al.*, 2015; Urriola and Rathore, 2015; Gao *et*  
518 *al.*, 2019; Ji *et al.*, 2019; Wei *et al.*, 2021; Fujita *et al.*, 2022). These data suggest an  
519 evolutionary convergence that has led to the emergence of GS1b isoforms with similar  
520 roles in different plant species. The expansion of the GS1b family in certain conifers

521 supports that GS1b diversification in angiosperms responds to different plant needs  
522 associated with N assimilation (Hirel and Krapp, 2021). In pine, *GS1b.1* has also been  
523 associated with this function due to its expression during zygotic and somatic embryo  
524 development (Pérez-Rodríguez *et al.*, 2005). All these expression data pose different  
525 hypotheses about the role of this new isoenzyme: a) GS1b.2 could support GS1b.1 activity  
526 in developing tissues with a high demand for glutamine or assimilated N; and b) GS1b.2  
527 could play a specific role in certain developing tissues.

528 To explore the differential roles of GS1b.1 and GS1b.2 in maritime pine, the structure, as  
529 well as the physicochemical and kinetic properties of both enzymes, were analyzed.  
530 Modeling of both maritime pine GS1b isoforms reports small differences between GS1b.1  
531 and GS1b.2 when their tertiary and quaternary structures were compared (Fig. 5A,B; S2).  
532 However, any minor difference in subunit arrangements could be of great importance since  
533 the GS active site is formed by the N- and C-terminal domains of adjacent subunits (Llorca  
534 *et al.*, 2006).

535 Although GS1b.1 and GS1b.2 are very similar in their primary sequences and structures,  
536 quite a few differences have been found in their properties. The thermodynamic stability of  
537 GS1b.1 was three times higher than that shown by GS1b.2 (Table 1). Both isoenzymes  
538 present similar values (approximately 63 kJ/mol) for the change in Gibbs free activation  
539 energy ( $\Delta G^\ddagger$ ), but their kinetic response to temperature changes below and above 24°C may  
540 be very different (Table 1). For the new isoform,  $\Delta G^\ddagger$  and the rate-limiting step are  
541 dominated by different activation parameters at different operating temperatures:  $\Delta H^\ddagger$  for  
542 temperatures below 24°C and  $T\Delta S^\ddagger$  for temperatures above 24°C. In contrast, GS1b.1  
543 showed a nonvariable activation energy throughout the whole range of temperatures  
544 assayed (Table 1). These differences in dominant activation parameters could reflect  
545 functional differences between the two active sites, as has been previously suggested for  
546 glutamine synthetase isoforms from other sources (Wedler and Horn, 1976).

547 The optimum pH levels for GS1b.1 and GS1b.2 are 6.5 and 6, respectively (Table 1; Fig.  
548 5C), similar to those of GS1b.2 and GS1b.3 from poplar (Castro-Rodríguez *et al.*, 2015).  
549 Interestingly, these optimal pH values are lower than the cytosolic pH (7.1-7.5) (Zhou *et al.*,  
550 *et al.*, 2021), which could be a mechanism to avoid enzyme inhibition by the acidification

551 process associated with GS activity and ammonium (Hachiya *et al.*, 2021). The optimum  
552 temperature for both enzymes (42 °C) (Table 1; Fig. 5D) is very similar to that shown by  
553 GS1b isoenzymes in other plants (Zhao *et al.*, 2014, Castro-Rodríguez *et al.*, 2015).  
554 However, both GS1b enzymes had exceptional thermostability compared to other GS1b  
555 enzymes of plants (Fig. 5E) (Sakakibara *et al.*, 1996; Zhao *et al.*, 2014; Castro-Rodríguez *et al.*,  
556 *et al.*, 2015). Concerning glutamate and ATP, GS1b.1 exhibited substrate inhibition behavior,  
557 as previously observed for *Arabidopsis* GLN1;3 (Table 2; Fig. 5G) (Ishiyama *et al.*,  
558 2004b). These inhibitions are consistent with the role of GS1b.1 in primary nitrogen  
559 assimilation in pine and its high expression since high levels of glutamate and ATP, outside  
560 of their homeostatic ranges, could indicate metabolic and energetic problems in the cell that  
561 may result in unnecessary or detrimental large-scale nitrogen assimilation. Interestingly,  
562 GS1b.2 exhibited positive cooperativity for glutamate (Table 2; Fig. 5G) and showed  
563 substrate inhibition for ammonium (Table 2; Fig. 5F). The positive cooperativity  
564 mechanism provides high sensitivity to fluctuating substrate concentrations (Levitzki and  
565 Koshland, 1976), enabling GS1b.2 to respond rapidly to changes in glutamate availability.  
566 In this case, the inhibition of GS1b.2 by ammonium could lead to control of the levels of  
567 the final product or to a specific function on the signaling pathway of one of its substrates.  
568 This is because both the end product and the substrate of the GS/GOGAT cycle, glutamate  
569 and ammonium, have been reported to play roles in plant growth and development (Qiu *et al.*  
570 *et al.*, 2020; Ortigosa *et al.*, 2021), where GS could act as an integrating link for both  
571 signaling pathways. Interestingly, glutamate has been described to play important roles in  
572 seed germination (Kong *et al.*, 2015), root architecture (Forde, 2014; López-Bucio *et al.*,  
573 2019) and pollen germination and pollen tube growth (Michard *et al.*, 2011; Wudick *et al.*,  
574 2018), among other functions (Qiu *et al.*, 2020). Ammonium has been shown recently to  
575 modulate plant root architecture in pine seedlings (Ortigosa *et al.*, 2022). Therefore, based  
576 on the *PpGS1b.2* expression patterns, the kinetic characteristics toward glutamate, and  
577 previous works, this enzyme could be involved in developmental processes. Furthermore,  
578 this could also be a mechanism to avoid high GS activity levels when ammonium is in  
579 excess, which could lead to excessive cytosol acidification (Hachiya *et al.*, 2021) of  
580 sensitive cells in developing tissues.

581 The structural, physicochemical, and kinetic analysis carried out in this work on the mutant  
582 enzymes showed some differences from the WT isoforms, but almost none of them  
583 achieved a complete exchange of the properties between GS1b.1 and GS1b.2. The  
584 mutations tested in this work did not greatly affect the protein structure, either in the  
585 surroundings of the exchanged amino acids and the subunit structure (Fig. 6A-G) or in the  
586 quaternary structure (Fig. S7), which could explain why the thermodynamic stability of the  
587 mutants was not compromised in any case (Table 1). Although all the mutants presented  
588 alterations in the activity levels at the different pH values and temperatures analyzed in  
589 comparison with the WT, only GS1b.1K264E,K267H and GS1b.2E264K produced  
590 variations in the optimal pH, and only GS1b.2E264K presented a considerable variation in  
591 its optimum temperature (Fig. S8B) and  $E_a$  (Table 1). In fact, among all the mutants,  
592 GS1b.2E264K presented the greatest number of changes in physicochemical properties. In  
593 fact, this could indicate that none of these amino acids have strong involvement in these  
594 enzyme properties or, perhaps, that the changes that can produce these mutations are being  
595 buffered by other residues.

596 Interestingly, these mutations had large effects on the kinetic properties (Table 2; Fig. 6K;  
597 S9-S12). The results suggest that these residues are involved in ammonium affinity.  
598 Although it has been described that the presence of glutamine and serine at positions 49 and  
599 174, respectively, is essential for the high affinity for ammonium in *Arabidopsis* GS  
600 (Ishiyama *et al.*, 2006), these residues are not present in either GS1b.1 or GSb1.2 of *P.*  
601 *pinaster*. Previous kinetic studies have shown the presence of high-affinity GS isoforms  
602 that either do not have this combination of amino acids or have none of them (Sakakibara *et*  
603 *al.*, 1996; de la Torre *et al.*, 2002; Yadav, 2009; Zhao *et al.*, 2014; Castro-Rodríguez *et al.*,  
604 2015). These previous works and the current results support the hypothesis proposed by  
605 Castro-Rodríguez *et al.* (2015), indicating that key residues determining GS behavior for  
606 ammonium may vary between plant species.

607 Mutations have produced a great number of changes in the behavior of these enzymes  
608 against their substrates and in their kinetic parameters. However, a reversal has only been  
609 achieved for ATP in double mutants, suggesting that the differences in these properties are  
610 due to the collaborative efforts of several residues, probably those that differ between the  
611 two enzymes. This may indicate that GS1b.1 and GS1b.2 have undergone evolutionary

612 selection so that the two enzymes satisfy different plant needs, with only minor changes in  
613 their amino acid sequences. This hypothesis is also supported by the differences between  
614 the two enzymes at the structural stability level (Fig. S4). When introduced at certain  
615 positions, some amino acids had a large effect on the protein stability of one isoform but  
616 not the other. The region between amino acids 260-300 of GS1b.2 was particularly affected  
617 by the introduction of some amino acids, but none of these substitutions appear to produce  
618 similar effects on GS1b.1. In fact, these data suggest that the two enzymes are probably  
619 undergoing different evolutionary paths.



620 **SUPPLEMENTARY DATA**

621 **Dataset S1.** Protein sequences used for phylogenetic analysis.

622 **Dataset S2.** Phylogenetic distance matrix.

623 **Dataset S3.** Original tree resulted from phylogenetic analysis in Newick format.

624 **Table S1.** GSs used for phylogenetic analysis.

625 **Table S2.** List of primers.

626 **Fig. S1. Purification of the recombinant GS proteins. A.** Coomassie staining of SDS-  
627 PAGE electrophoresis gels. **B.** Western-blot using GS-specific antibodies for GS1b.1 and  
628 GS1b.2 detection. Molecular weight ladder (L), soluble fraction (S), binding fraction (B),  
629 wash step 1 (W1), wash step 2 (W2), Elution 1 to 9 (E1-9), concentrated fraction (C).

630 **Fig. S2. Promoter region analysis of *PpGS1b.1* and *PpGS1b.2*.** For promoter  
631 comparison, 1916 and 2408 nucleotides upstream of start codon of *PpGS1b.1* and  
632 *PpGS1b.2* were recovered from genomic data, respectively (Sterck *et al.*, 2022). **A.**  
633 Sequences alignment of the promoter region. Position 1995 corresponds to -1 nt before start  
634 codon. **B.** Putative transcription factor binding sites identified using the PlantRegMap  
635 prediction tool (Tian *et al.*, 2020).

636 **Fig. S3. GS1b.1 WT and GS1b.2 WT quaternary structure. A.** GS1b.1 WT quaternary  
637 structure. **B.** GS1b.2 WT quaternary structure.

638 **Fig. S4. Structural stability of GS1b.1 and GS1b.2 against amino acid substitution.**  
639 The presented amino acids have been substituted in each position of GS1b.1 and GS1b.2  
640 amino acid sequences. The differences in the folding free energy between WT and mutant  
641 ( $\Delta\Delta G$ ) for GS1b.1 and GS1b.2 are compared (square plots). The rectangular plots represent  
642 the difference between GS1b.1  $\Delta\Delta G$  and GS1b.2  $\Delta\Delta G$  (Y axis) for each position (X axis).

643 **Fig. S5. Representation of kinetic characteristics of GS1b.1 WT and GS1b.2 WT for**  
644 **magnesium and ATP. A.** Magnesium. **B.** ATP.

645 **Fig. S6. Subunit structure of the GS1b.1 and GS1b.2 mutants. A.** GS1b.1K264E. **B.**  
646 GS1b.1K267H. **C.** GS1b.2E264K. **D.** GS1b.2H267K. Amino acids exchanged, and amino

647 acids associated with them by hydrogen bonds are represented in dark magenta. Amino  
648 acids from 330 to the end of the protein are represented in green.

649 **Fig. S7. Quaternary structure of the GS1b.1 and GS1b.2 mutants. A.** GS1b.1K264E. **B.**  
650 GS1b.1K267H. **C.** GS1b.1K264E,K267H. **D.** GS1b.2E264K. **E.** GS1b.2H267K. **F.**  
651 GS1b.2E264K,H267K.

652 **Fig. S8. Physicochemical properties of the GS1b.1 and GS1b.2 mutants.** Activity of the  
653 GS1b.1K264E, GS1b.1K267H, GS1b.2E264K, GS1b.2H267K have been tested at different  
654 pH levels (**A**) and temperatures (**B**). Their thermal stability has been also characterized (**C**).

655 **Fig. S9. Representation of kinetic characteristics of GS1b.1 and GS1b.2 single mutants**  
656 **for ammonium.**

657 **Fig. S10. Representation of kinetic characteristics of GS1b.1 and GS1b.2 single and**  
658 **double mutants for glutamate.**

659 **Fig. S11. Representation of kinetic characteristics of GS1b.1 and GS1b.2 single and**  
660 **double mutants for magnesium.**

661 **Fig. S12. Representation of kinetic characteristics of GS1b.1 and GS1b.2 mutants for**  
662 **ATP.**

663

## 664 **ACKNOWLEDGEMENTS**

665 The authors are grateful to Professor Francisco Ruiz Cantón for the kind supply of adult  
666 tree samples, to Jean François Trontin for the kind supply of embryo samples and to José  
667 Miguel Granados for his help during needle harvesting.

## 668 **AUTHOR CONTRIBUTIONS**

669 JMVM, FO and RAC have performed the experiments. RAC performed the phylogenetic  
670 analysis. JMVM and JCA have made the *in silico* structural protein analyses. JMVM and  
671 RAC have written the manuscript. FO, JCA, CA and FMC made additional contributions  
672 and edited the manuscript. JMVM and RAC have planned and designed the research. RAC,  
673 CA and FMC were responsible of the funding acquisition.

674 **CONFLICT OF INTEREST**

675 The authors declare that they have no conflicts of interest in relation to the content of this  
676 manuscript.

677 **FUNDING**

678 This work was funded by *Spanish Ministerio de Economía y Competitividad*, grant number  
679 BIO2015-73512-JIN MINECO/AEI/FEDER, UE, and Ministerio de Ciencia e Innovación,  
680 grant number PID2021-125040OB-I00, MICINN, FEDER, UE. This work was also  
681 supported by *Junta de Andalucía*, grant number P20\_00036 PAIDI 2020/FEDER, UE; and  
682 the *Universidad de Málaga* grant B4-2021-01 (Ayudas Plan Propio). JMVM was supported  
683 by a scholarship from the Spanish *Ministerio de Educación y Formación Profesional*  
684 (FPU17/03517). FO was supported by a grant from the Universidad de Málaga (*Programa*  
685 *Operativo de Empleo Juvenil vía SNJG, UMAJI11, FEDER, FSE, Junta de Andalucía*) and  
686 funds of the research group BIO-114 (Biología Molecular y Biotecnología) from PAIDI,  
687 Junta de Andalucía.

688 **DATA AVAILABILITY**

689 All the sequences of the cloned cDNA were submitted to NCBI's Genbank under the  
690 accession numbers KU641797 (*PpGS1a*); KU641798 (*PpGS1b.1*); and KU641796  
691 (*PpGS1b.2*). Constructions are available from the corresponding authors upon request. The  
692 rest of data supporting the findings of this study are available within the paper and within  
693 its supplementary materials published online.

## REFERENCES

- Afgan E, Baker D, Batut B, et al.** 2018. The Galaxy platform for accessible, reproducible and collaborative biomedical analyses: 2018 update. *Nucleic Acids Research*, 46, W537-W544.
- Aledo JC.** 2021. ptm: an R package for the study of methionine sulfoxidation and other post-translational modifications. *Bioinformatics*. 37, 3979–3980
- Altschul SF, Gish W, Miller W, Myers EW, Lipman DJ.** 1990. Basic local alignment search tool. *Journal of Molecular Biology*, 215, 403-410.
- Ávila C, Suárez MF, Gómez-Maldonado J, Cánovas FM.** 2001. Spatial and temporal expression of two cytosolic glutamine synthetase genes in Scots pine: functional implications on nitrogen metabolism during early stages of conifer development. *The Plant Journal*, 25, 93-102
- Ávila C, Llebrés MT, Castro-Rodríguez V, Lobato-Fernández C, Reymond I, Harvengt L, Trontin J-F, Cánovas FM.** 2022. Identification of metabolic pathways differentially regulated in somatic and zygotic embryos of maritime pine. *Frontiers in Plant Science*, 13, 877960.
- Bao A, Zhao Z, Ding G, Shi L, Xu F, Cai H.** 2014. Accumulated expression level of cytosolic *glutamine synthetase 1* gene (*OsGs1;1* or *OsGS1;2*) alter plant development and the carbon-nitrogen metabolic status in rice. *PLoS ONE*, 9.
- Bernard SM, Habash DZ.** 2009. The importance of cytosolic glutamine synthetase in nitrogen assimilation and recycling. *New Phytologist*, 182, 608–620.
- Blackwell RD, Murray AJS, Lea PJ.** 1987. Inhibition of photosynthesis in barley with decreased levels of chloroplastic glutamine synthetase activity. *Journal of Experimental Botany*, 196, 1799–1809.
- Bolger AM, Lohse M, Usadel B.** 2014. Trimmomatic: a flexible trimmer for Illumina Sequence Data. *Bioinformatics* 30, 2114-2120.

**Bradford MM.** 1976. A rapid and sensitive method for the quantitation of microgram quantities of protein utilizing the principle of protein-dye binding. *Analytical Biochemistry*, 72, 248-254.

**Canales J, Rueda-López M, Craven-Bartle B, Ávila C, Cánovas FM.** 2012. Novel insights into regulation of asparagine synthetase in conifers. *Frontiers in Plant Science*, 24.

**Cánovas FM, Cantón FR, Gallardo F, García-Gutiérrez A, de Vicente A.** 1991. Accumulation of glutamine synthetase during early development of maritime pine seedlings (*Pinus pinaster*). *Planta*, 185, 372-378.

**Cantón FR, García-Gutiérrez A, Crespillo R, Cánovas FM.** 1996. High-level expression of *Pinus sylvestris* glutamine synthetase in *Escherichia coli*. Production of polyclonal antibodies against the recombinant protein and expression studies in pine seedlings. *FEBS Letters*, 393, 205-210.

**Cantón FR, Suárez MF, Josè-Estanyol M, Cánovas FM.** 1999. Expression analysis of a cytosolic glutamine synthetase gene in cotyledons of Scots pine seedlings: developmental, light regulation and spatial distribution of specific transcripts. *Plant Molecular Biology*, 40, 623-34.

**Cañas RA, Canales J, Gómez-Maldonado J, Ávila C, Cánovas FM.** 2014. Transcriptome analysis in maritime pine using laser capture microdissection and 454 pyrosequencing. *Tree physiology*, 34, 1278-1288.

**Cañas RA, Canales J, Muñoz-Hernández C, Granados JM, Ávila C, García-Martín ML, Cánovas FM.** 2015. Understanding developmental and adaptive cues in pine through metabolite profiling and co-expression network analysis. *Journal of Experimental Botany*, 66, 3113-3127.

**Cañas RA, Li Z, Pascual MB, Castro-Rodríguez V, Ávila C, Sterck L, Van de Peer Y, Cánovas FM.** 2017. The gene expression landscape of pine seedling tissues. *The Plant Journal*, 91, 1064-1087.

**Castro-Rodríguez V, García-Gutiérrez A, Cañas RA, Pascual MB, Ávila C, Cánovas FM.** 2015. Redundancy and metabolic function of the glutamine synthetase gene family in poplar. *BMC Plant Biology*, 15, 20.

**de la Torre F, García-Gutiérrez A, Crespillo R, Cantón FR, Ávila C, Cánovas FM.** 2002. Functional expression of two pine glutamine synthetase genes in bacteria reveals that they encode cytosolic holoenzymes with different molecular and catalytic properties. *Plant and Cell Physiology*, 43, 802-809.

**De Smet R, Van de Peer Y.** 2012. Redundancy and rewiring of genetic networks following genome-wide duplication events. *Current Opinion in Plant Biology*, 15, 168-176.

**Edelheit O, Hanukoglu A, Hanukoglu I.** 2009. Simple and efficient site-directed mutagenesis using two single-primer reactions in parallel to generate mutants for protein structure-function studies. *BMC Biotechnology* 9.

**Edgar RC.** 2004. MUSCLE: multiple sequence alignment with high accuracy and high throughput. *Nucleic Acids Research*, 32, 1792-1797.

**Forde BG, Lea PJ.** 2007. Glutamate in plants: metabolism, regulation, and signaling. *Journal of Experimental Botany*, 58, 2339-2358.

**Forde BG.** 2014. Glutamate signalling in roots. *Journal of Experimental Botany*, 65, 779-787.

Fujita T, Beier MP, Tabuchi-Kobayashi M, et al. 2022. Cytosolic glutamine synthetase GS1;3 is involved in rice grain ripening and germination. *Frontiers in Plant Science*, 13.

**Funayama K, Kojima S, Tabuchi-Kobayashi M, Sawa Y, Nakayama Y, Hayakawa T, Yamaya T.** 2013. Cytosolic glutamine synthetase 1;2 is responsible for the primary assimilation of ammonium in rice roots. *Plant and Cell Physiology*, 54, 934-943.

**Gao Y, de Bang TC, Schjoerring JK.** 2019. Cisgenic overexpression of cytosolic glutamine synthetase improves nitrogen utilization efficiency in barley and prevents grain protein decline under elevated CO<sub>2</sub>. *Plant Biotechnology Journal*, 17, 1209-1221.

**Gawronski JD, Benson DR.** 2004. Microtiter assay for glutamine synthetase biosynthetic activity using inorganic phosphate detection. *Analytical Biochemistry*, 327, 114-118.

**Gómez-Maldonado J, Ávila C, Barnestein P, Crespillo R, Cánovas FM.** 2004a. Interaction of cis-acting elements in the expression of a gene encoding cytosolic glutamine synthetase in pine seedlings. *Physiologia Plantarum*, 121, 537-545.

**Gómez-Maldonado J, Cánovas FM, Ávila C.** 2004b. Molecular analysis of the 5'-upstream of a gibberellin-inducible cytosolic glutamine synthetase gene (*GS1b*) expressed in pine vascular tissue. *Planta*, 218, 1036-1045.

**Goodall AJ, Kumar P, Tobin AK.** 2013. Identification and expression analyses of cytosolic glutamine synthetase genes in barley (*Hordeum vulgare* L.). *Plant and Cell Physiology*, 54, 492-505.

**Grabherr MG, Haas BJ, Yassour M, et al.** 2011. Full-length transcriptome assembly from RNA-seq data without a reference genome. *Nature Biotechnology*, 29, 644-652.

**Guan M, Moller IS, Schjoerring JK.** 2015. Two cytosolic glutamine synthetase isoforms play specific roles for seed germination and seed yield structure in *Arabidopsis*. *Journal of Experimental Botany*, 66, 203-212.

**Granados JM, Ávila C, Cánovas FM, Cañas RA.** 2016. Selection and testing of reference genes for accurate RT-qPCR in adult needles and seedlings of maritime pine. *Tree Genetic & Genomes*, 12, 60-75.

**Habash DZ, Massiah AJ, Rong HL, Wallsgrove RM, Leigh RA.** 2001. The role of cytosolic glutamine synthetase in wheat. *Annals of Applied Biology*, 138, 83-89.

**Hachiya T, Inaba J, Wakazaki M, et al.** 2021. Excessive ammonium assimilation by plastidic glutamine synthetase causes ammonium toxicity in *Arabidopsis thaliana*. *Nature Communications*, 12.

**Heldt H, Piechulla B.** 2011. *Plant Biochemistry: fourth edition*. San Diego: Academic Press, Elsevier.

**Hirel B, Krapp A.** 2021. Nitrogen utilization in ulants I biological and agronomic importance. In: Joseph Jez, editor. *Encyclopedia of Biological Chemistry III (Third Edition)*. Amsterdam, The Netherlands: Elsevier BV, pp. 127-140

**Ishiyama K, Inoue E, Tabuchi M, Yamaya T, Takahashi H.** 2004a. Biochemical background and compartmentalized functions of cytosolic glutamine synthetase for active ammonium assimilation in rice roots. *Plant and Cell Physiology*, 45, 1640-1647.

**Ishiyama K, Inoue E, Watanabe-Takahashi A, Obara M, Yamaya T, Takahashi H.** 2004b. Kinetic properties and ammonium-dependent regulation of cytosolic isoenzymes of glutamine synthetase in *Arabidopsis*. *The Journal of Biological Chemistry*, 279, 16598-16605.

**Ishiyama K, Inoue E, Yamaya T, Takahashi H.** 2006. Gln49 and Ser174 residues play critical roles in determining the catalytic efficiencies of plant glutamine synthetase. *Plant and Cell Physiology*, 47, 299-303.

**James D, Borphukan B, Fartyal D, Achary VMM, Reddy MK.** 2018. Transgenic manipulation of glutamine synthetase: A target with untapped potential in various aspects of crop improvement. In: Gosal SS, Wani SH, editors. *Biotechnology of Crop Improvement*. Cham: Springer International Publishing AG, pp 367–416.

**Ji Y, Li Q, Liu G, Selvaraj G, Zheng Z, Wei Y.** 2019. Roles of cytosolic glutamine synthetase in *Arabidopsis* development and stress responses. *Plant and Cell Physiology* 60, 657-671.

**Jmol.** An open-source Java viewer for chemical structures in 3D. <http://www.jmol.org/>. Accessed August 2022.

**Jones DT, Taylor WR, Thornton JM.** 1992. The rapid generation of mutation data matrices from protein sequences. *Computer Applications in the Biosciences*, 8, 275-282.

**Jumper J, Evans R, Pritzel A, et al.** 2021. Highly accurate protein structure prediction with AlphaFold. *Nature*, 596, 583-589.

**Kong D, Ju C, Parihar A, Kim S, Cho D, Kwak JM.** 2015. *Arabidopsis* glutamate receptor homolog3.5 modulates cytosolic Ca<sup>2+</sup> level to continue effect of abscisic acid in seed germination. *Plant Physiology*, 167, 1630-1642.

**Lea PJ and Ireland RJ.** 1999. Nitrogen metabolism in higher Plants. In: Singh BK, editor. *Plant Amino Acids*. New York: Marcel Dekker Inc, pp. 1-47.

**Letunic I, Bork P.** 2019. Interactive Tree Of Life (iTOL) v4: recent updates and new developments. *Nucleic Acids Research*, 47, W256-W259.



**Levitzi A, Koshland Jr DE.** 1976. The role of negative cooperativity and half-of-the-sites reactivity in enzyme regulation. *Current Topics in Cellular Regulation*, 10, 1-40.

**Llorca O, Betti M, González JM, Valencia A, Márquez AJ, Valpuesta JM.** 2006. The three-dimensional structure of an eukaryotic glutamine synthetase: Functional implications of its oligomeric structure. *Journal of Structural Biology*, 156, 469-479.

**López-Bucio JS, de la Cruz HR, and Guevara-García AA.** 2019. Glutamate sensing in plants. In: Ramakrishna A, Roshchina VV, editors. *Neurotransmitters in plants: perspectives and applications*. Raton: CRC Press, pp. 231–140.

**Lothier J, Gaufichon L, Sormani R, Lemaître, Azzopardi M, Morin H, Chardon F, Reisdorf-Cren M, Avice JC, Masclaux-Daubresse C.** 2011. The cytosolic glutamine synthetase GLN1;2 plays a role in the control of plant growth and ammonium homeostasis in *Arabidopsis* rosettes when nitrate supply is not limiting. *Journal of Experimental Botany*, 62, 1375-1390.

**Michard E, Lima PT, Borges F, Silva AC, Portes MT, Carvalho JE, Gilliham M, Liu LH, Obermeyer G, Feijó JA.** 2011. Glutamate receptor-like genes form Ca<sup>2+</sup> channels in pollen tubes and are regulated by pistil D-serine. *Science* 332, 434-437.

**Martin A, Lee J, Kichey T, Gerentes D, et al.** 2006. Two cytosolic glutamine synthetase isoforms of maize are specifically involved in the control of grain production. *The Plant Cell*, 18, 3252-3274.

**Mirdita M, Schütze K, Moriwaki Y, Heo L, Ovchinnikov S, Steinegger M.** 2022. ColabFold: making protein folding accessible to all. *Nature Methods*, 19, 679-682.

**Moreira E, Coimbra S, Melo P.** 2022. Glutamine synthetase: an unlikely case of functional redundancy in *Arabidopsis thaliana*. *Plant Biology*, 24, 713-720.

**Pérez-Rodríguez MJ, Suárez MF, Heredia R, et al.** 2005. Expression patterns of two glutamine synthetase genes in zygotic and somatic pine embryos support specific roles in nitrogen metabolism during embryogenesis. *New Phytologist*, 169, 35-44.

**Qiu XM, Sun YY, Ye XY, Li ZG.** 2020. Signaling role of glutamate in plants. *Frontiers in Plant Science*, 13.

**Ortigosa F, Lobato-Fernández C, Shikano H, Ávila C, Taira S, Cánovas FM, Cañas RA.** 2022. Ammonium regulates the development of pine roots through hormonal crosstalk and differential expression of transcription factors in the apex. *Plant, Cell and Environment*, 45, 915-935.

**Ritz C, Spiess AN.** 2008. qpcR: an R package for sigmoidal model selection in quantitative real-time polymerase chain reaction analysis. *Bioinformatics*, 24, 1549-1551.

**Sakakibara H, Shimizu H, Hase T, Yamazaki Y, Takao T, Shimonishi Y, Sugiyama T.** 1996. Molecular identification and characterization of cytosolic isoforms of glutamine synthetase in maize roots. *The Journal of Biological Chemistry*, 271, 29561-29568.

**Schrödinger and DeLano.** 2020. PyMol. <http://www.pymol.org/pymol>. Accessed August 2022.

**Schneider WL, Gifford DJ.** 1994. Loblolly pine seed dormancy. I. The relationship between protein synthesis and the loss of dormancy. *Physiologia Plantarum*, 90, 246-252.

**Shin WH, Lee GR, Heo L, Lee H, Seok C.** 2014. Prediction of protein structure and interaction by GALAXY protein modelin programs. *Bio Design*, 2, 1-11.

**Sterck L, de María N, Cañas RA, et al.** 2022. Maritime Pine Genomics in Focus. In: De La Torre, A.R. (eds) *The Pine Genomes. Compendium of Plant Genomes*. Springer, Cham, 67-123.

**Suárez MF, Ávila C, Gallardo F, Cantón FR, García-Gutiérrez AG, Claros MG, Cánovas FM.** 2002. Molecular and enzymatic analysis of ammonium assimilation in woody plants. *Journal of experimental Botany*, 53, 891-904.

**Tabuchi M, Sugiyama K, Ishiyama K, Inoue E, Sato T, Takahashi H, Yamaya T.** 2005. Severe reduction in growth rate and grain filling of rice mutants lacking *OsGS1;1* a cytosolic glutamine synthetase1;1. *The Plant Journal*, 42, 641-651.

**Tamura K, Stecher G, Kumar S.** 2021. MEGA11: molecular evolutionary genetics analysis version 11. *Molecular Biology and Evolution*, 38, 3022-3027.

**Tegeder M, Masclaux-Daubresse C.** 2017. Source and sink mechanisms of nitrogen transport and use. *New Phytologist*, 217, 35-53.

**Thomsen HC, Eriksson D, Møller IS, Schjoerring JK.** 2014. Cytosolic glutamine synthetase: a target for improvement of crop nitrogen use efficiency? Trends in Plant Science, 19, 656–663.

**Tian F, Yang DC, Meng YQ, Jin J, Gao G.** 2020. PlantRegMap: charting functional regulatory maps in plants. Nucleic Acids Research, 48, D1104-D1113.

**Urriola J, Rathore KS.** 2015. Overexpression of a glutamine synthetase gene affects growth and development in sorghum. Transgenic Research, 24, 397-407.

**Valderrama-Martín JM, Ortigosa F, Ávila C, Cánovas FM, Hirel B, Cantón FR, Cañas RA.** 2022. A revised view on the evolution of glutamine synthetase isoenzymes in plants. The Plant Journal, 110, 946-960.

**Varadi M, Anyango S, Deshpande M, et al.** 2022. AlphaFold protein structure database: massively expanding the structure coverage of protein-sequence space with high-accuracy models. Nucleic Acids Research, 50, D439-D444.

**Villalobos DP.** 2008. Aproximación genómica al estudio de la formación de la madera en los pinos. Universidad de Málaga, Málaga (Spain). Doctoral dissertation.

**Wallsgrave RM, Turner JC, Hall NP, Kendall AC, Bright SWJ.** 1987. Barley mutants lacking chloroplast glutamine synthetase-Biochemical and genetic analysis. Plant Physiology, 83, 155-158.

**Wedler FC, Horn BR.** 1976. Catalytic mechanisms of glutamine synthetase enzymes. Studies with analogs of possible intermediates and transition states. Journal of Biological Chemistry, 251, 7530-7538.

**Wei Y, Xiong S, Zhang Z, Meng X, Wang L, Zhang X, Yu M, Yu H, Wang X, Ma X.** 2021. Localization, gene expression, and functions of glutamine synthetase isoenzymes in wheat grain (*Triticum aestivum* L.). Frontiers in Plant Science, 12, 580405.

**Wudick MM, Portes MT, Michard E, et al.** 2018. CORNICHON sorting and regulation of GLR channels underlie pollen tube Ca<sup>2+</sup> homeostasis. Plant Science, 360, 533-536.

**Yadav SK.** 2009. Computational structural analysis and kinetic studies of a cytosolic glutamine synthetase from *Camellia sinensis* (L.) O. Kuntze. Protein Journal, 28, 428-434.

**Yamaya T, Kusano M.** 2014. Evidence supporting distinct functions of three cytosolic glutamine synthetases and two NADH-glutamate synthases in rice. *Journal of Experimental Botany*, 65, 5519-5525.

**Zhao W, Yang J, Tian Y, Fu X, Zhu B, Xue Y, Gao J, Han HJ, Peng R, Yao QH.** 2014. Expression, purification, and characterization of recombinant mangrove glutamine synthetase. *Molecular Biology Reports*, 41, 7575-7583.

**Zhou JY, Hao DL, Yang GZ.** 2021. Regulation of cytosolic pH: the contributions of plant plasma membrane H<sup>+</sup>-ATPases and multiple transporters. *International Journal of Molecular Sciences*, 22.

## TABLES

**Table 1.** Physicochemical properties of the wild type PpGS1b.1 and PpGS1b.2 and their mutated versions.

| Property                              | GS1b.1WT | GS1b.2WT      | GS1b.1K264E | GS1b.2E264K | GS1b.1K267H   | GS1b.2H267K   | GS1b.1<br>K264E,K267H | GS1b.2<br>E264K,H267K |
|---------------------------------------|----------|---------------|-------------|-------------|---------------|---------------|-----------------------|-----------------------|
| Optimum temperature                   | 42       | 42            | 45          | 30          | 45            | 45            | 45                    | 45                    |
| Optimum pH                            | 6.5      | 6             | 6.5         | 7           | 6.5           | 6             | 6                     | 6                     |
| Monomer $\Delta G$ folding (kcal/mol) | -9.7     | -2.7          | -10.1       | -2.3        | -9.2          | -2.7          | -10.0                 | -2.3                  |
| Ea (kJ/mol)                           | 39.8     | 46.1 / 18.7   | 34.8        | 39.9        | 35.2 / 6.7    | 33.7 / 10.3   | 15.2                  | 28.4 / 6.7            |
| $\Delta G^\ddagger$ (kJ/mol)          | 63.6     | 62.6 / 62.8   | 63.5        | 62.3        | 62.9 / 62.2   | 63.1 / 62.4   | 62.7                  | 62.1 / 62.0           |
| $\Delta H^\ddagger$ (kJ/mol)          | 36.9     | 43.6 / 16.1   | 32.3        | 37.4        | 32.7 / 4.3    | 31.2 / 7.9    | 12.7                  | 25.9 / 4.2            |
| $T\Delta S^\ddagger$ (kJ/mol)         | -26.7    | -19.0 / -46.7 | -31.2       | -24.9       | -30.2 / -57.9 | -31.9 / -54.5 | -50.0                 | -36.2 / -57.8         |
| Break (°C)                            |          | 24            |             |             | 34            | 35            |                       | 27.5                  |

**Table 2.** Kinetic properties of the wild type PpGS1b.1 and PpGS1b.2 and their mutated versions.

| Substrate        | GS1b.1WT                            | GS1b.2WT                            | GS1b.1K264E                      | GS1b.2E264K                         | GS1b.1K267H                      | GS1b.2H267K                      | GS1b.1<br>K264E,K267H | GS1b.2<br>E264K,H267K            |
|------------------|-------------------------------------|-------------------------------------|----------------------------------|-------------------------------------|----------------------------------|----------------------------------|-----------------------|----------------------------------|
|                  | $\text{NH}_4^+$                     | Vmax 38.15<br>Km 0.12               | Vmax 6.48<br>Km 0.21<br>Ki 22.57 | Vmax 21.01<br>Km 0.16               | Vmax 16.36<br>Km 0.16            | Vmax 79.3<br>Km 0.06<br>Ki 13.14 | Vmax 58.26<br>Km 0.05 | Vmax 36.05<br>Km 0.02            |
| Glu              | Vmax 101.6<br>Km 64.18<br>Ki 84.51  | Vmax 7.66<br>nH 1.311<br>EC50 48.63 | Vmax 16.82<br>Km 2.20            | Vmax 15.69<br>Km 18.41              | Non saturated                    | Non saturated                    | Non saturated         | Non saturated                    |
| $\text{Mg}^{2+}$ | Vmax 71.32<br>nH 1.66<br>EC50 14.49 | Vmax 5.64<br>nH 2.33<br>EC50 10.87  | Non saturated                    | Vmax 25.43<br>nH 1.61<br>EC50 26.78 | Non saturated                    | Non saturated                    | Non saturated         | Non saturated                    |
| ATP              | Vmax 24.96<br>Km 0.18<br>Ki 5.88    | Vmax 7.39<br>Km 0.29                | Vmax 29.73<br>Km 0.11<br>Ki 3.19 | Vmax 27.40<br>Km 0.21<br>Ki 8.23    | Vmax 59.82<br>Km 0.06<br>Ki 5.85 | Vmax 28.57<br>Km 0.39<br>Ki 8.76 | Vmax 38.69<br>Km 0.09 | Vmax 100.6<br>Km 0.42<br>Ki 5.06 |

EC50 in mM; Ki in mM; Km in mM; nH is dimensionless; Vmax in nkat/mg protein.

## FIGURE LEGENDS

### **Fig. 1. Protein alignment and evolutionary analysis by Maximum Likelihood method.**

**A.** Protein alignment of maritime pine GSs. PpGS1a sequence is showed as reference, dots highlight conserved residues in the three sequences. **B.** The evolutionary history was inferred by using the Maximum Likelihood method and JTT matrix-based model (Jones et al., 1992). The tree with the highest log likelihood (-12198.89) is shown. The percentage of trees in which the associated taxa clustered together is shown next to the branches. Initial tree(s) for the heuristic search were obtained automatically by applying Neighbor-Join and BioNJ algorithms to a matrix of pairwise distances estimated using the JTT model, and then selecting the topology with superior log likelihood value. The tree is drawn to scale, with branch lengths measured in the number of substitutions per site. This analysis involved 96 amino acid sequences. All positions containing gaps and missing data were eliminated (complete deletion option). There was a total of 348 positions in the final dataset. Evolutionary analyses were conducted in MEGA11 (Tamura et al, 2021). Numbers close to the branches shown bootstrap values. The first two letters of the sequence names correspond to the genera and species listed in Table S1. Golden tree branches correspond to GS2 sequences; blue branches to GS1a sequences; and red branches to GS1b sequences. Discontinuous lines in GS1b branches highlight the new sequences found in *Pinus* and *Picea* genera. Red dots shown the sequences from *Pinus* and *Picea* genera.

### **Fig. 2. GS gene expression in maritime pine seedlings.**

**A.** Expression levels of GS genes of maritime pine during germination and initial seedling development. Stage 1 (S1) corresponds to seedlings with active mobilization of reserves from megagametophyte to the seedling (one-week-old from emergence). Stage 2 (S2) corresponds to seedlings without megagametophyte and developing the first new needles (one-month-old from emergence).

**B.** Gene expression levels of GS in tissues from one-month-old seedlings (Cañas et al., 2017). AM, shoot Apical Meristem; EN, Emerging Needles; YNM, Young Needles Mesophyll tissue; YNV, Young Needles Vascular tissue; CM, Cotyledon Mesophyll tissue; CV, Cotyledon Vascular tissue; HC, Hypocotyl Cortex; HV, Hypocotyl Vascular tissue; HP, Hypocotyl Pith; RC, Root Cortex; RV, Root Vascular tissue; DRC, Root Developing Cortex; DRV, Root Developing Vascular tissue; RM, Root apical Meristem. Letters above

the columns highlight the statistical significance ( $P < 0.05$ ) in a Tukey post-hoc test after an ANOVA analysis. Error bars show SE with  $n=3$ .

**Fig. 3. Seasonal GS expression profiles in pine needles from adult trees.** **A.** Expression levels of GS genes were determined in needles from maritime pine along a year. Each needle whorl corresponds to the annual growth of a single year, the whorls were named by numbers, from 0 to 3 being this the oldest whorl. The whorl 0 corresponds to needles emerged in the same year of harvesting. For supplementary information see Cañas et al. (2015). Asterisks above the data points highlight the statistical significance ( $P < 0.05$ ) between needle whorls in a specific month in a Tukey post-hoc test after an ANOVA analysis. Error bars show SE with  $n=3$ . **B.** Expression levels of GS genes in buds and developing needles during the first 21 days of emergence. Letters above the data points highlight the statistical significance ( $P < 0.05$ ) in a Tukey post-hoc test after an ANOVA analysis. Error bars show SE with  $n=3$ . **C.** Picture of buds and male strobilus in April during the first harvesting time. **D.** Picture of buds and emerging needles in May at four harvesting point (21 days).

**Fig. 4. GS expression levels in different developing tissues.** **A.** Gene expression levels of *PpGS1a*, *PpGS1b.1* and *PpGS1b.2* in different tissues of adult trees: juvenile and mature phloem; juvenile and mature xylem; and male and female strobili. **B.** Gene expression of *PpGS1b.1* and *PpGS1b.2* in different parts of the root from one-month-old seedlings: primary root, lateral roots, and root tip. **C.** Genes expression of *PpGS1b.1* and *PpGS1b.2* in different developmental stages of zygotic embryos: PC (pre-cotyledonary stage); EC (early cotyledonary stage), C (cotyledonary stage) and M (mature embryo). Letters above the columns highlight the statistical significance ( $P < 0.05$ ) in a Tukey post-hoc test after an ANOVA analysis. Error bars show SE with  $n=3$ .

**Fig. 5. Enzymatic characterization of recombinant GS1b.1 and GS1b.2 isoforms.** **A.** Comparison of GS1b.1 and GS1b.2 subunit structure GSb1.1 is represented in green and GS1b.2 in cyan. The region that presented most differences between GS1b.1 and GS1b.2 (amino acids from 125 to 150) are represented in red and pink respectively. **B** Root mean square deviation (RMSD) values between GS1b.1 and GS1b.2 monomers structure. **C.** Enzyme activity at different assay pH (from 4.5 to 10) for GS1b.1 (red line) and GS1b.2



(blue line). **D.** Enzyme activity at different assay temperature (from 5 to 70°C) for GS1b.1 (red line) and GS1b.2 (blue line). **E.** Thermal stability of GS1b.1 and GS1b.2 at different temperatures (37, 42, 45, 53 and 60°C) after different preincubation times (from 0 to 20 min). **F.** Kinetics of GS1b.1 and GS1b.2 for ammonium. **G.** Kinetics of GS1b.1 and GS1b.2 for glutamate. Error bars show the SD. Mean values are composed with at least three independent determinations.

**Fig. 6. Characterization of mutated GS1b.1 and GS1b.2 proteins.** Disposition of the amino acids, either those that have been exchanged and those associated with them by hydrogen bonds in the GS1b.1 K264E (**A**), GS1b.2 E264K (**B**), GS1b.1 K267H (**C**) and GS1b.2 H267K (**D**) mutants. Alpha carbons of the amino acids are represented in pink. **E.** Amino acid region affected by mutations. Subunit structure of the GS1b.1 (**F**) and GS1b.2 (**G**) double mutant. Amino acids exchanged and amino acids associated with them by hydrogen bonds are represented in dark magenta. Amino acids from 330 to the end of the protein are represented in green. **H.** Comparison of the physicochemical properties of the GS1b.1 WT and its double mutant. **I.** Comparison of the physicochemical properties of the GS1b.2 WT and its double mutant. **J.** Thermal stability of the double mutants at different temperatures (37, 42, 45, 53 and 60°C) after different preincubation times (from 0 to 20 min). **K.** Kinetics of GS1b.1 and GS1b.2 double mutants for ammonium. Error bars show the SD. Mean values are composed with at least three independent determinations.



**A**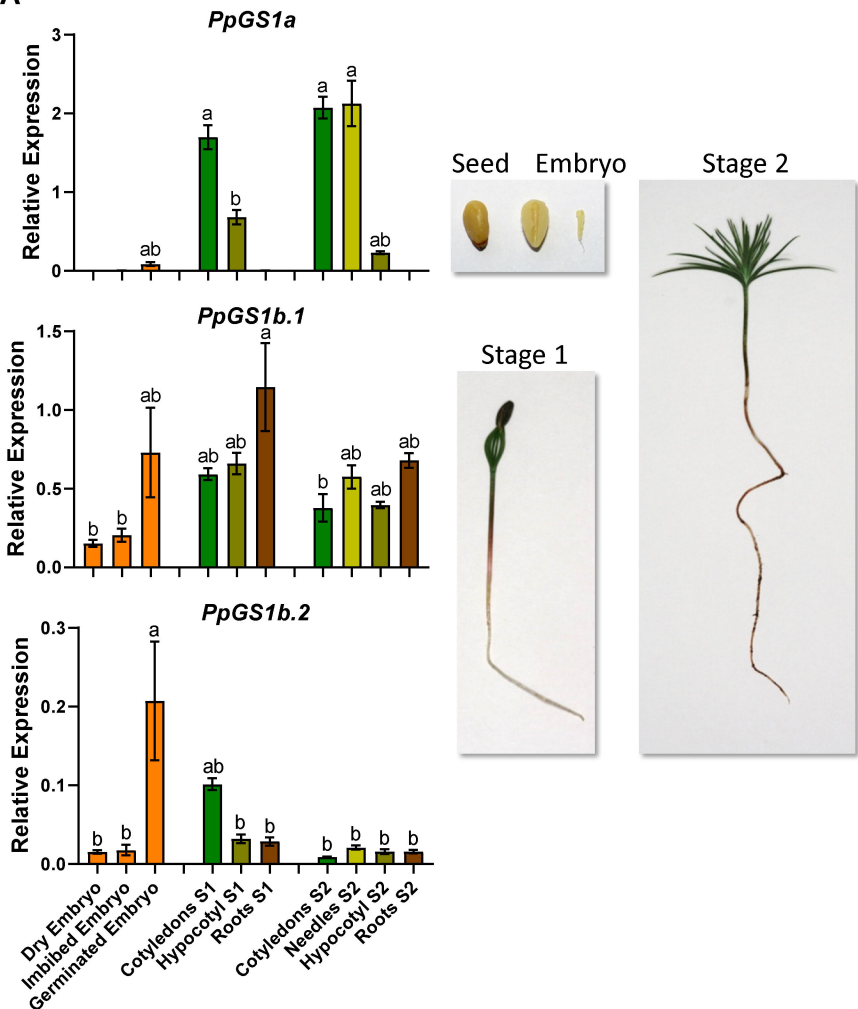**B**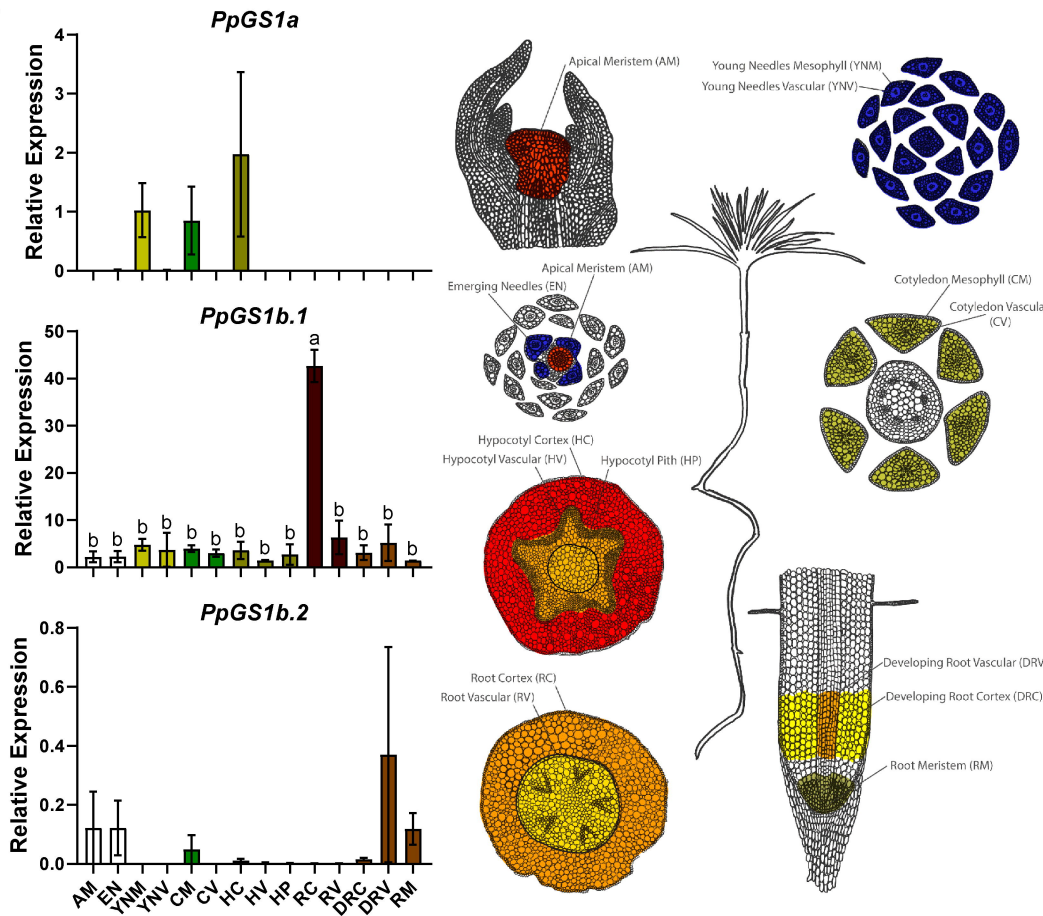

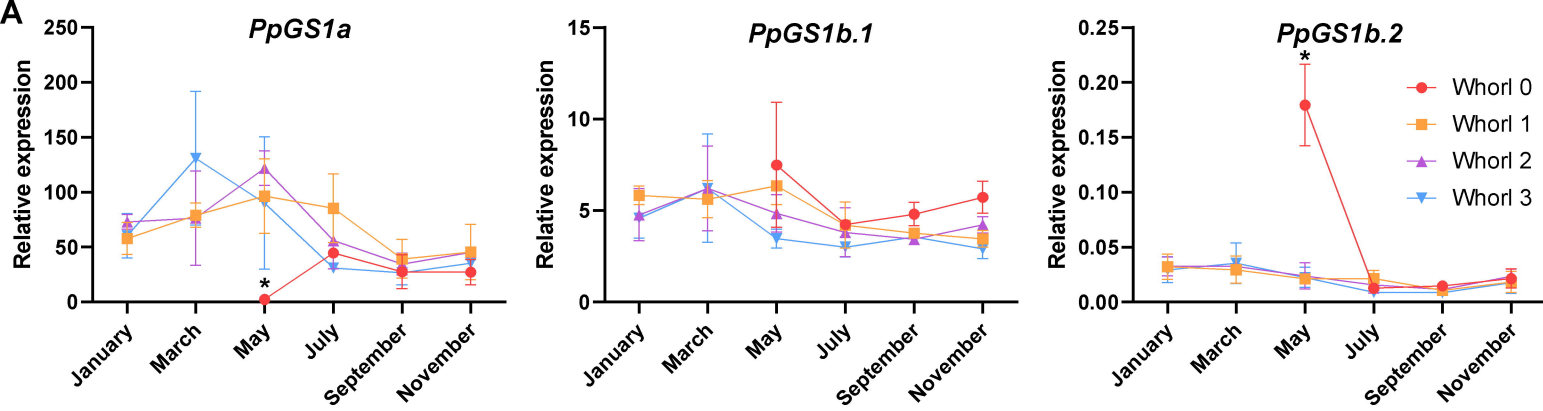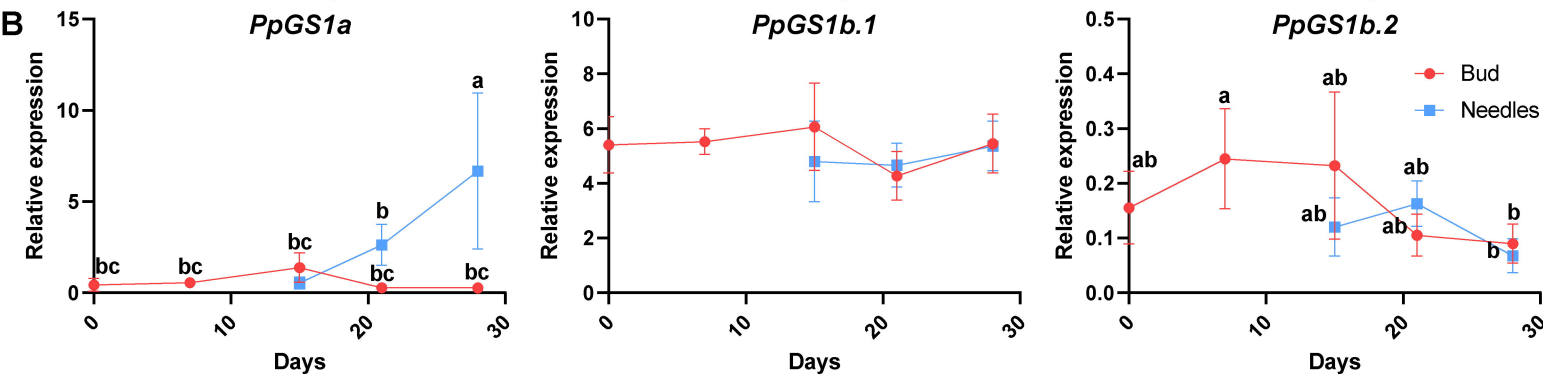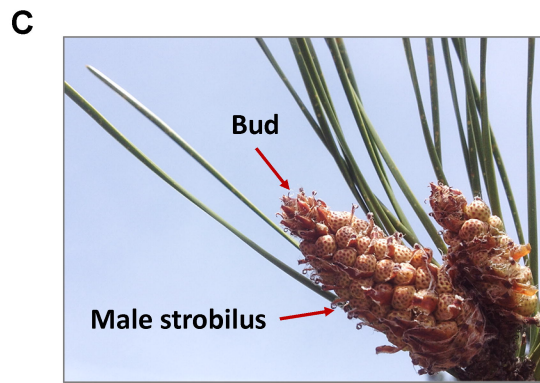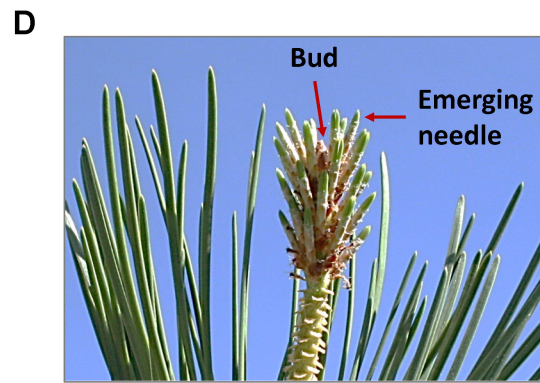

**A**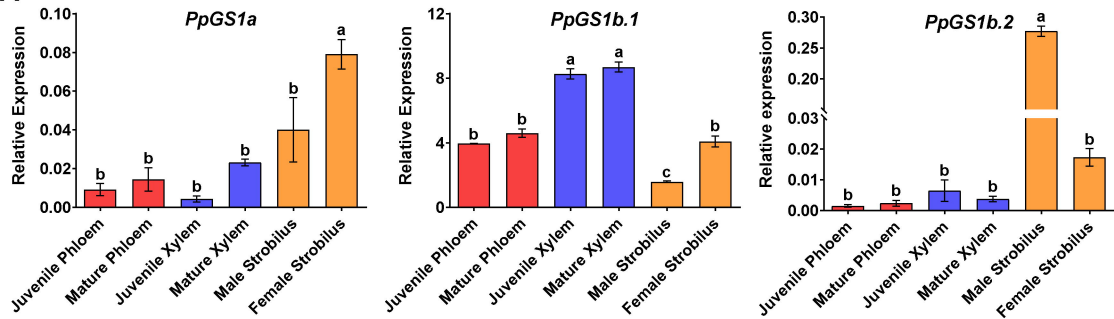**B**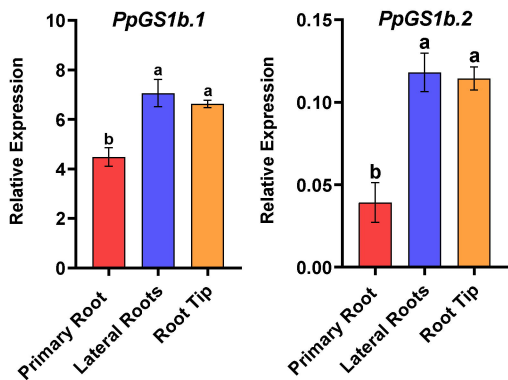**C**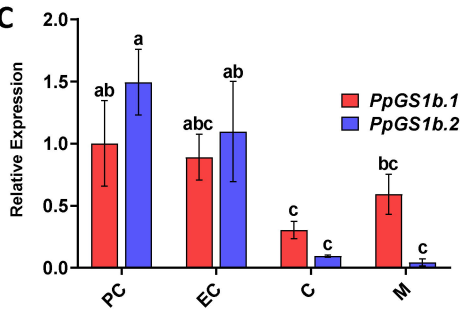

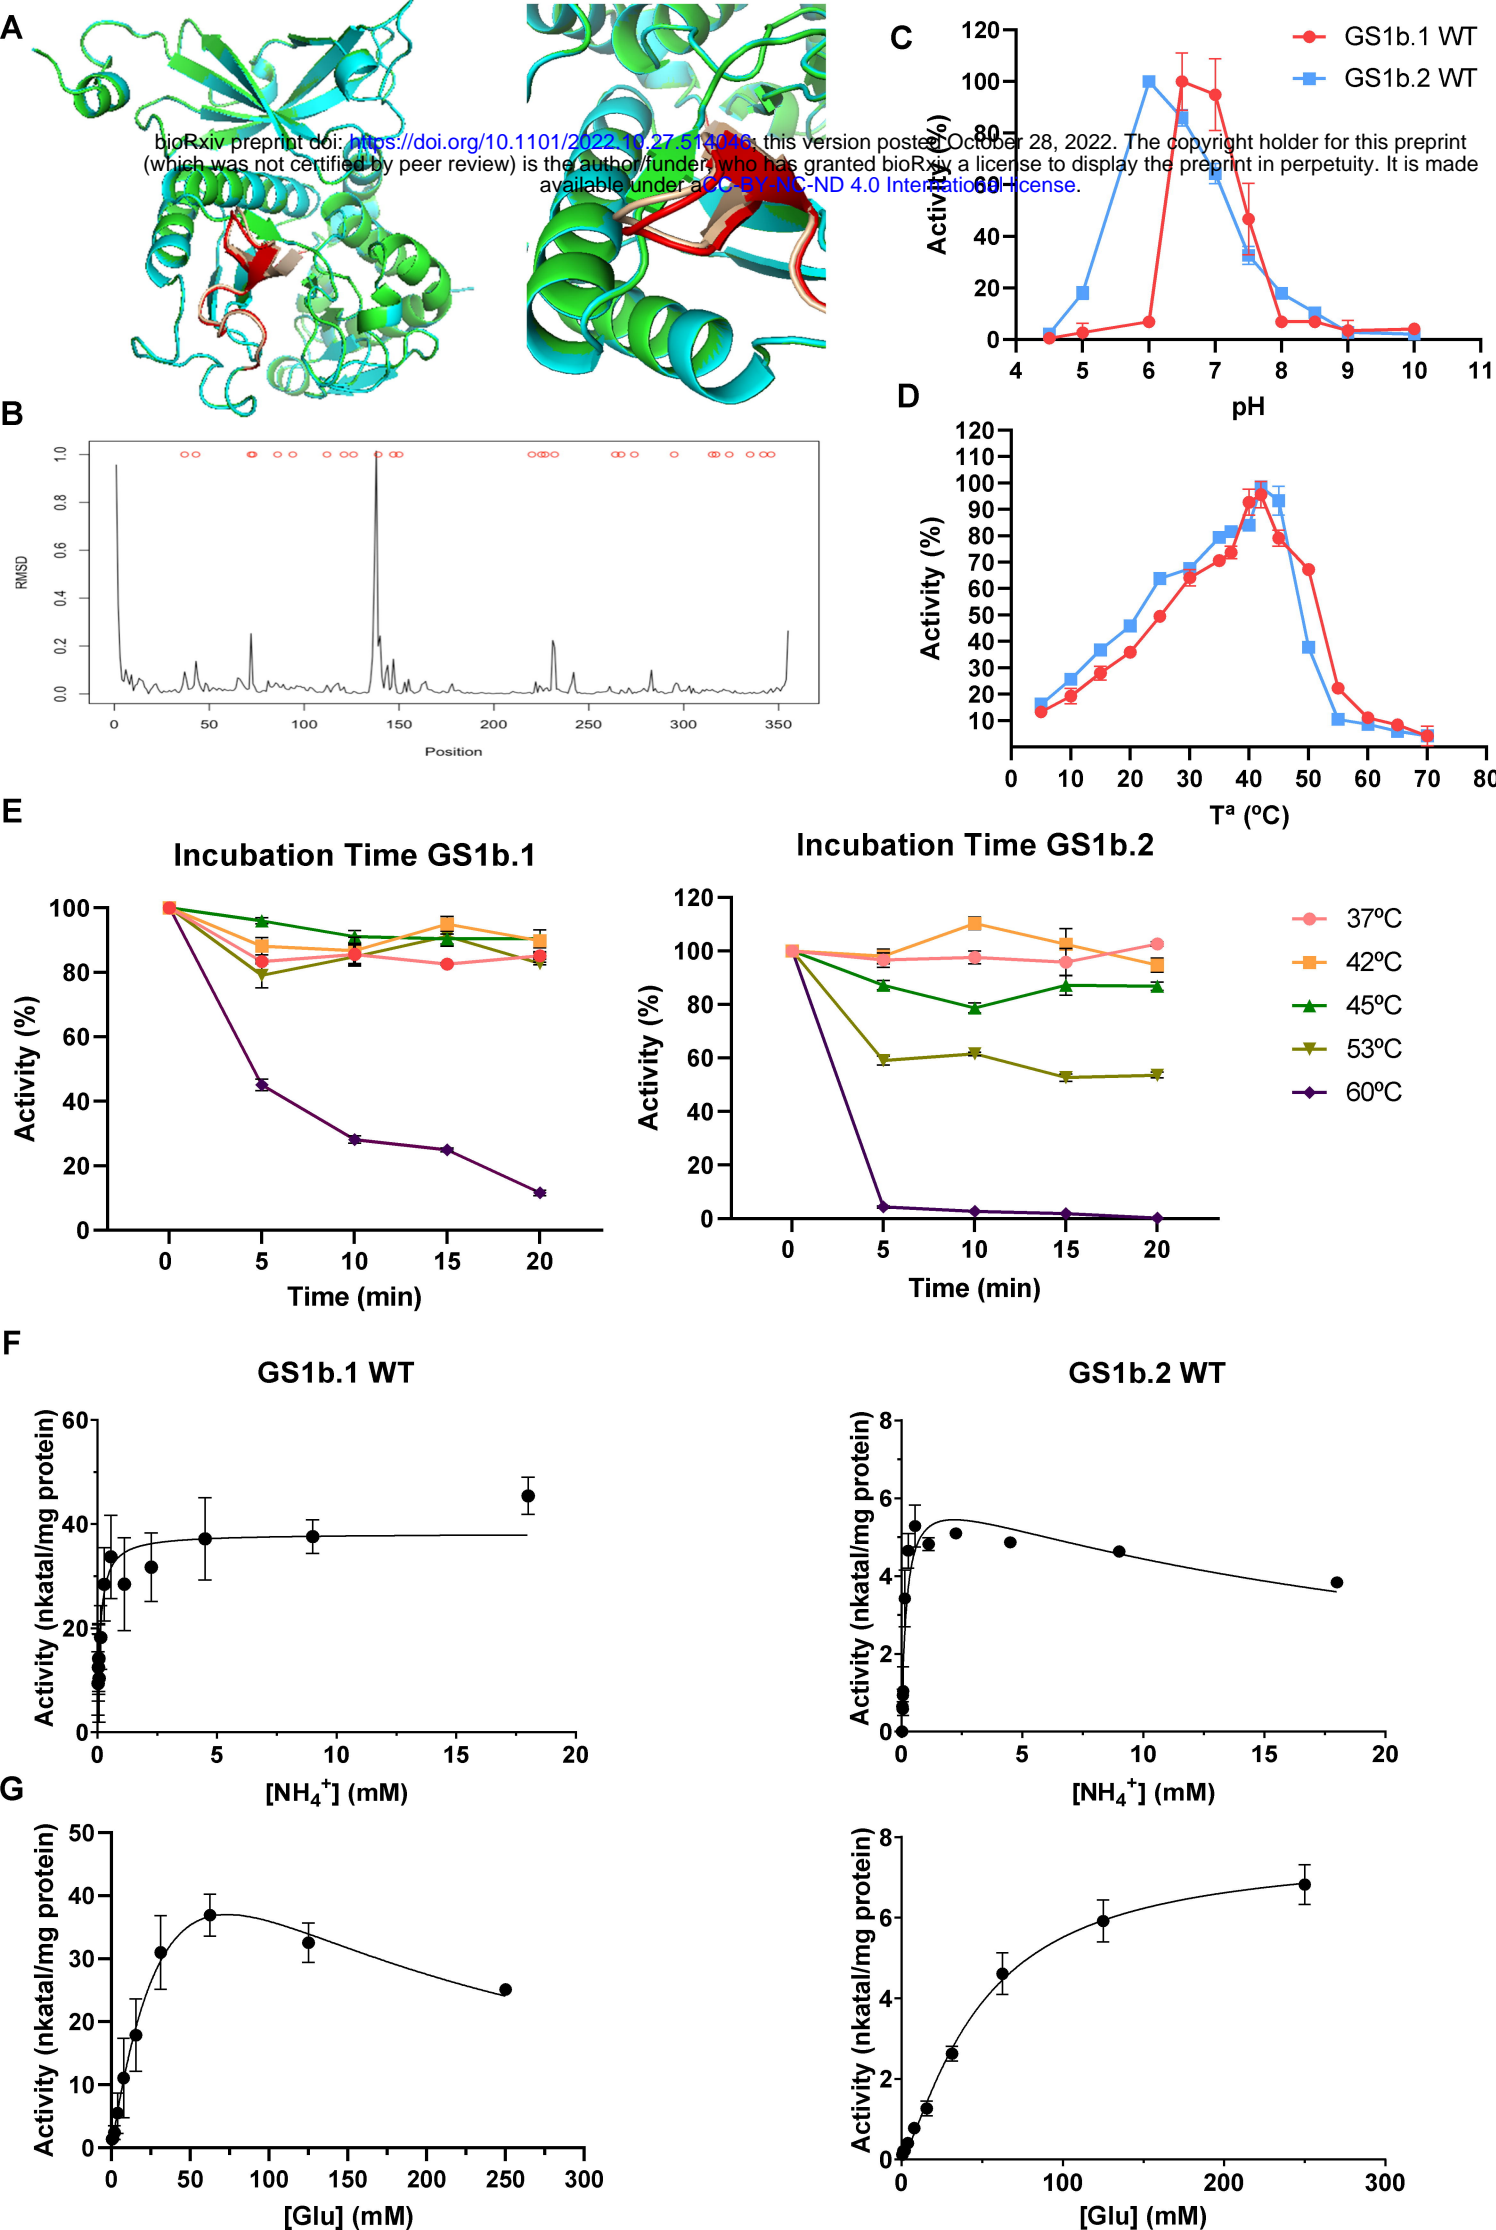

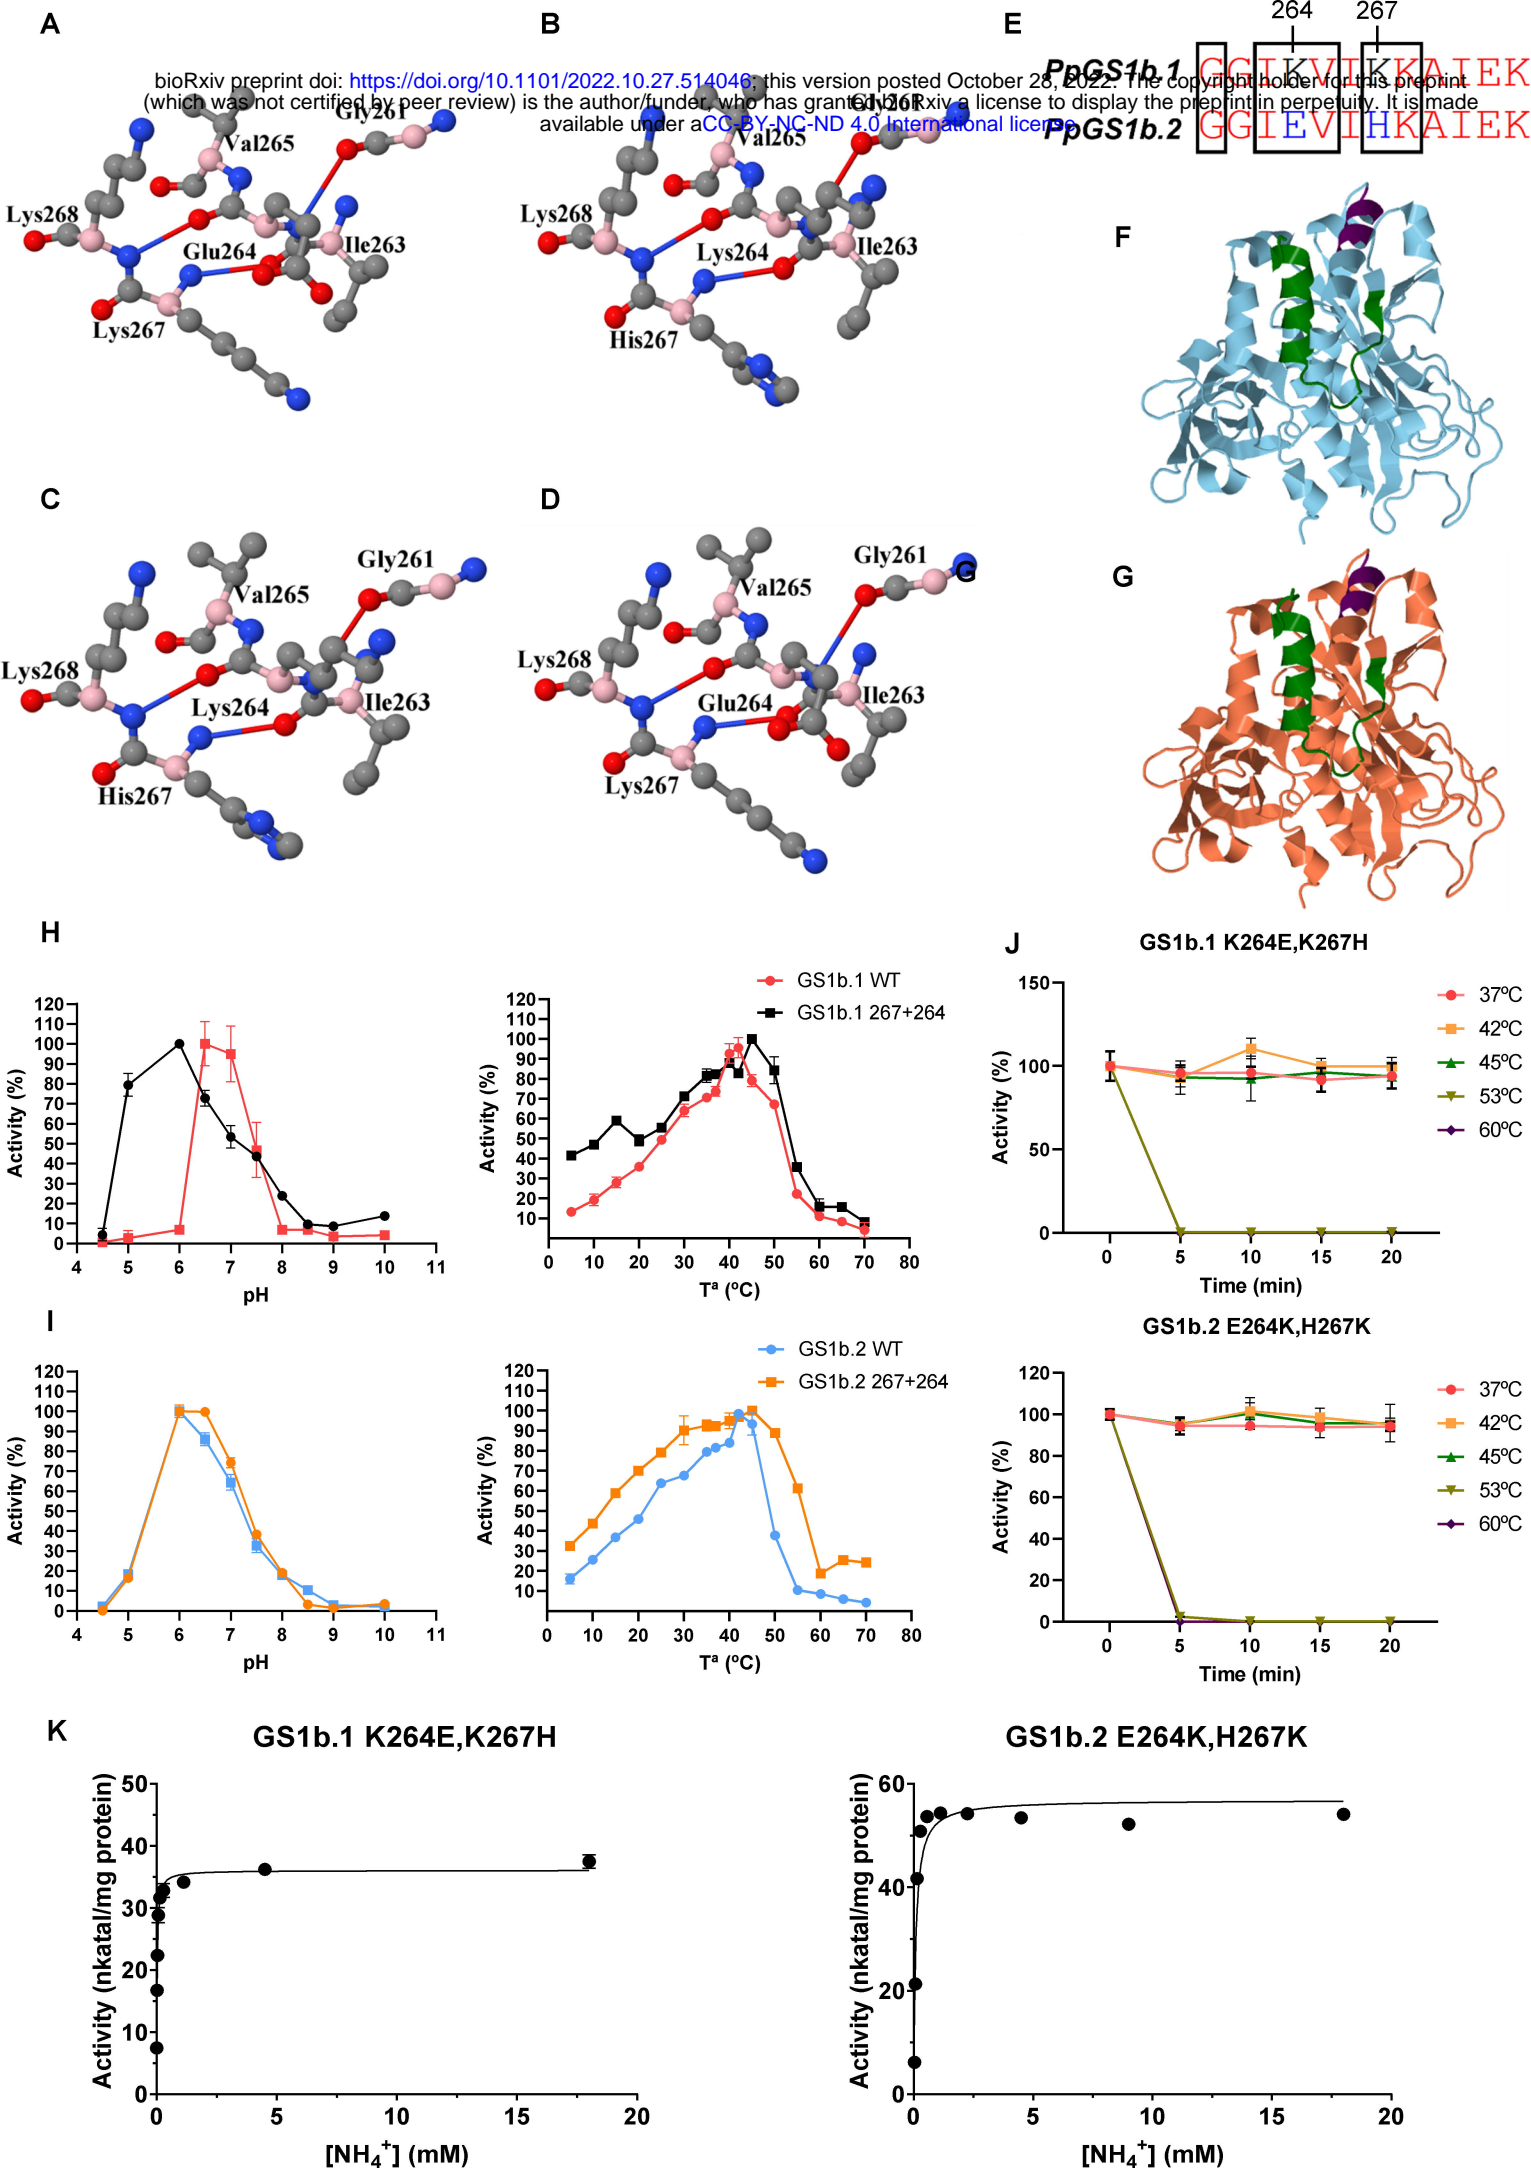

Source: https://www.biorxiv.org/content/10.1101/2022.10.27.514046v1.full.pdf
